# Supplementary material for: Deciphering the metamorphic evolution of the Pulo do Lobo metasedimentary belt (SW Iberian Variscides)
Source: Copernicus journal article supplement (doi:10.5194/se-2019-143), 2019-10-07
Supplement: Supplementary file [file se-2019-143-AC2-supplement.pdf]

1 **Deciphering the metamorphic evolution of the Pulo do**  
2 **Lobo metasedimentary beltdomain (SW Iberian**  
3 **Variscides)**

4  
5 Irene Pérez-Cáceres<sup>1</sup>, David Jesús Martínez Poyatos<sup>1</sup>, Olivier Vidal<sup>2</sup>, Olivier Beysac<sup>3</sup>,  
6 Fernando Nieto<sup>4</sup>, José Fernando Simancas<sup>1</sup>, Antonio Azor<sup>1</sup> and Franck Bourdelle<sup>5</sup>

7  
8 1 Departamento de Geodinámica, Facultad de Ciencias, Universidad de Granada, Campus de  
9 Fuentenueva s/n, 18071 Granada, Spain.

10 2 Institut de Sciences de la Terre (ISTerre), CNRS-University of Grenoble 1, 1381 rue de la Piscine,  
11 38041 Grenoble, France.

12 3 Institut de Physique des Matériaux et de Cosmochimie (IMPMC), CNRS-Sorbonne Université,  
13 Case Courrier 115, 4 place Jussieu, 75005 Paris, France.

14 4 Departamento de Mineralogía y Petrología, IACT, Facultad de Ciencias, Universidad de Granada-  
15 CSIC, Campus de Fuentenueva s/n, 18071 Granada, Spain.

16 5 Laboratoire Génie Civil et géo-Environnement (LGCgE), Université de Lille, Bât. SN5, Cité  
17 Scientifique, 59655 Villeneuve d'Ascq, France

Con formato: Español (España)

18 Correspondence to: Irene Pérez-Cáceres (perezcaceres@ugr.es)

19  
20  
21 **Abstract**

22 The Pulo do Lobo beltdomain is one of the units related to the orogenic suture between the  
23 Ossa-Morena and the South Portuguese zones in the SW Iberian Variscides. This  
24 metasedimentary unit has been classically interpreted as a Rheic subduction-related  
25 accretionary prism formed during the pre-Carboniferous convergence and eventual collision  
26 between the South Portuguese Zone (part of Avalonia) and the Ossa-Morena Zone (peri-  
27 Gondwanan terrane). Discrete mafic intrusions also occur in the dominant Pulo do Lobo  
28 metapelites, related to an intraorogenic Mississippian transtensional and magmatic event that  
29 had a significant thermal input. Three different approaches have been applied to the  
30 Devonian/Carboniferous phyllites and slates of the Pulo do Lobo beltdomain in order to  
31 study their poorly known low-grade metamorphic evolution. X-Ray diffraction (XRD) was  
32 used to unravel the mineralogy and measure crystallographic parameters (illite “crystallinity”  
33 and K-white mica *b*-cell dimension). Compositional maps of selected samples were obtained  
34 from electron probe microanalysis, which allowed processing with XmapTools software, and  
35 chlorite semi-empirical and thermodynamic geothermometry was performed. Thermometry

36 based on Raman spectroscopy of carbonaceous material (RSCM) was used to obtain peak  
37 temperatures.

38 The microstructural study shows the existence of two phyllosilicate growth events at the  
39 chlorite zone, the main one ( $M_1$ ) related to the development of a Devonian foliation  $S_1$ , and  
40 a minor one ( $M_2$ ) associated with a crenulation cleavage ( $S_2$ ) developed at middle/upper  
41 Carboniferous time.  $M_1$  entered well into epizone (greenschist facies) conditions.  $M_2$   
42 conditions were at lower temperature, reaching the anchizone/epizone boundary. These data  
43 accord well with the unconformity that separates the Devonian and Carboniferous  
44 formations of the Pulo do Lobo ~~belt~~domain. The varied results obtained by the different  
45 approaches followed, combined with microstructural analysis, are indicative of different  
46 snapshots of the metamorphic history. Thus, RSCM temperatures are higher in comparison  
47 with the other methods applied, which is interpreted as reflecting a faster reequilibration  
48 during the short-lived thermal Mississippian event. Regarding the metamorphic pressure, the  
49 data are very homogeneous ~~to~~ very low celadonite content (0-10 %) in muscovite (and low  
50 values of K-white mica *b*-cell dimension 8.995 Å mean value), indicating a low-  
51 pressure/temperature gradient, which is unexpected in a subduction-related accretionary  
52 prism.

53

#### 54 **Keywords**

55 Pulo do Lobo metapelites

56 Low-pressure gradient

57 ~~X-Ray diffraction~~

58 Illite “crystallinity”

59 Chlorite geothermometry

60 Raman spectroscopy of carbonaceous material

61

#### 62 **Highlights**

63 A multidisciplinary approach has been applied to study the metamorphism of the Pulo do  
64 Lobo metapelites.

65 Devonian metamorphism entered epizone conditions.

66 Carboniferous metamorphism reached the anchizone/epizone boundary.

67 The inferred low-pressure gradient is incompatible with a subduction-related accretionary  
68 prism.

## 69 1. Introduction

70 The knowledge of temperature and pressure conditions reached by the low-grade  
71 metasedimentary units stacked hinterlands of orogens helps to better interpret their  
72 tectonometamorphic evolution (e.g., Goffé and Velde, 1984; Franceschelli et al., 1986; Ernst,  
73 1988; Gutiérrez-Alonso and Nieto, 1996; Frey and Robinson, 1999; Bousquet et al., 2008;  
74 Lanari et al., 2012). In this regard, the various results derived from the application of diverse  
75 geothermometric and/or geobarometric methods may also allow the identification and  
76 characterization of superposed tectonometamorphic events, thus improving the knowledge  
77 of the P-T paths and their tectonic significance (e.g., Brown, 1993; Crouzet et al., 2007; Ali,  
78 2010; Lanari et al., 2012; Airaghi et al., 2017).

79 The metamorphism of the Iberian Variscides has been mostly studied on intensely  
80 metamorphosed rocks in order to characterize high-grade events and obtain the P-T-t paths  
81 of suture-related units (e.g., Gil Ibarra et al., 1990; Abalos et al., 1991; Escuder Viruete et  
82 al., 1994; Barbero, 1995; Arenas et al., 1997; Fonseca et al., 1999; López-Carmona et al., 2013;  
83 Martínez Catalán et al., 2014). The low- to very low-grade units have been also studied (e.g.,  
84 Martínez Catalán, 1985; Bastida et al., 1986, 2002; López Munguira et al., 1991; Gutiérrez-  
85 Alonso and Nieto, 1996; Abad et al., 2001, 2002, 2003a; Martínez Poyatos et al., 2001; Nieto  
86 et al., 2005; Vázquez et al., 2007), despite the scarcity of appropriate robust methodologies  
87 to apply in these kind of rocks. Obtaining new results from the low-grade rocks of the Pulo  
88 do Lobo [belt domain](#), a suture-related low-grade unit in SW Iberia, is of capital importance  
89 in order to understand its significance and tectonometamorphic evolution, that have been  
90 cause of discrepancies, and to reconstruct the overall history of the SW Iberian Variscides.

91 In this work, three different methodologies are applied to a number of samples of the Pulo  
92 do Lobo [belt domain](#) (Fig. 1): (i) X-Ray Diffraction (XRD) in order to identify minerals not  
93 easily recognizable with optical microscopy (fine-grained muscovite, paragonite, mixed-layer  
94 phyllosilicates, etc.) and obtain thermobarometric information via the measurement of  
95 crystallographic parameters (illite “crystallinity” and *b*-cell dimension); (ii) Compositional  
96 maps derived from electron probe microanalysis (EPMA), which enable the recognition of  
97 different tectonometamorphic events by combining mineral composition and microtextural  
98 features (e.g., Airaghi et al., 2017), as well as the application of geothermobarometers based  
99 on chlorite and K-white mica compositions; and (iii) Raman spectroscopy of carbonaceous  
100 material (RSCM) to estimate peak temperatures thanks to an adapted thermometric  
101 calibration. Firstly, the results obtained enables discussing the tectonometamorphic  
102 evolution of the Pulo do [BeltLobo domain](#). Moreover, the comparison of the different  
103 approaches allows [to](#) know further their reliability and sensitivity to characterize different  
104 geological processes.

105

## 106 2. Geological setting

107 The SW Iberian Variscides resulted from the Devonian-Carboniferous left-lateral oblique  
108 collision of three different terranes: the Central Iberian Zone (CIZ), the Ossa-Morena Zone  
109 (OMZ) and the South Portuguese Zone (SPZ) (Fig. 1a). The boundaries between these  
110 terranes are considered as orogenic sutures ([e.g., Quesada, 1990; Pérez-Estaún and Bea, 2004;](#)

111 Pérez-Cáceres et al., 2016, ~~and references therein~~). Besides the dominant left-lateral  
112 shortening kinematics, SW Iberia also attests Mississippian synorogenic sedimentary basins,  
113 widespread mafic magmatism and high-temperature metamorphic areas, which altogether  
114 reveal an intraorogenic transtensional stage (Simancas et al., 2003, 2006; Pereira et al., 2012;  
115 Azor et al., 2019).

116 The OMZ is commonly interpreted as a continental piece that drifted from the CIZ (i.e.,  
117 north Gondwana) in early Paleozoic times (Matte, 2001). The OMZ/CIZ suture (Badajoz-  
118 Córdoba Shear Zone) includes early Paleozoic amphibolites with oceanic affinity, eclogite  
119 relicts and intense high- to low-grade left-lateral shear imprint (Burg et al., 1981; Abalos et  
120 al., 1991; Azor et al., 1994; Ordóñez-Casado, 1998; López Sánchez-Vizcaíno et al., 2003;  
121 Pereira et al., 2010). Ediacaran to Carboniferous sedimentary successions with an  
122 unconformity at the base or the Lower Carboniferous characterize the OMZ. Low-grade  
123 regional metamorphism dominates the OMZ, though there are areas of high-temperature /  
124 low-pressure metamorphism associated with Early Carboniferous magmatism (e.g. Bard,  
125 1977; Crespo-Blanc, 1991; Díaz Azpiroz et al., 2006; Pereira et al., 2009).

126 The SPZ is a continental piece considered as a fragment of Avalonia (~~Pérez-Cáceres et al.,  
127 2017, and references therein~~). ~~Thus, thus~~ the OMZ/SPZ boundary is usually interpreted as  
128 the Rheic Ocean suture (~~Crespo-Blanc and Orozco; 1988; Eden and Andrews, 1990; Silva et  
129 al., 1990; Quesada et al., 1994; Braid et al., 2011; Pérez-Cáceres et al., 2015 and references  
130 therein, 2017~~). This boundary is delineated by the Beja-Acebuches Amphibolites (Fig. 1b), a  
131 narrow strip of metamafic rocks that resembles a dismembered ophiolitic succession (from  
132 greenschists to metagabbros and locally ultramafic rocks) (e.g., Bard, 1977; Crespo-Blanc,  
133 1991; Quesada et al., 1994). This unit was interpreted as a Rheic ophiolite (Munhá et al.,  
134 1986; Crespo-Blanc, 1991; Fonseca and Ribeiro, 1993; Quesada et al., 1994; Castro et al.,  
135 1996), though this idea was reconsidered based on the Mississippian age of the mafic  
136 protholites ( $\approx 340$  Ma; Azor et al., 2008). ~~Actually~~ At present, the Beja-Acebuches unit is better  
137 interpreted as an outstanding evidence of the early Carboniferous intraorogenic, lithospheric-  
138 scale transtensional and magmatic episode that here obscures the previous suture-related  
139 features of the OMZ/SPZ boundary (Pérez-Cáceres et al., 2015 and references therein).  
140 Nevertheless, there is also the alternative explanation that the OMZ/SPZ boundary was a  
141 protected tract of Rheic oceanic lithosphere that did not close until Carboniferous time  
142 (Murphy et al., 2016; Braid et al., 2018; Quesada et al., 2019). The rocks of the Beja-  
143 Acebuches Amphibolites were affected by a left-lateral ductile shearing that occurred at  
144 granulite to greenschist facies conditions, though amphibolite facies conditions were  
145 dominant (e.g., Quesada et al., 1994; Castro et al., 1996; Castro et al., 1999; Díaz Azpiroz et  
146 al., 2006). This metamorphism has been dated at 345-330 Ma (Dallmeyer et al., 1993; Castro  
147 et al., 1999), thus suggesting that it started very shortly after the magmatic emplacement.

148 North of the Beja-Acebuches Amphibolites, the allochthonous Cubito-Moura unit might be  
149 the only witness of the Rheic Ocean suture (Fonseca et al., 1999; Araújo et al., 2005; Pérez-  
150 Cáceres et al., 2015). This unit was emplaced onto the southern OMZ border (Fig. 1b) with  
151 a left-lateral top-to-the-ESE kinematics (Ponce et al., 2012). It contains Ediacaran-Lower  
152 Paleozoic metasediments and Ordovician MORB-featured mafic rocks ( $\approx 480$  Ma; Pedro et  
153 al., 2010) transformed into high-pressure blueschists and eclogites at  $\approx 370$  Ma (Moita et al.,  
154 2005). The high-pressure metamorphism has also been studied by using white mica and

155 chlorite (and chloritoid pseudomorphs) mineral equilibria (Booth-Rea et al., 2006; Ponce et  
156 al., 2012; Rubio Pascual et al., 2013), yielding peak conditions of 1 GPa at 450 °C.

157 South of the Beja-Acebuches Amphibolites, low- to very low-grade successions crop out ~~in~~  
158 ~~the SPZ~~: Devonian siliciclastics, earliest Carboniferous volcano-sedimentary rocks, and a  
159 south-migrating Carboniferous flysch (e.g., Oliveira, 1990). ~~The SPZ can be divided, from~~  
160 ~~north to south~~; ~~These rocks are usually grouped~~ into ~~two geological domains~~: the Pulo do  
161 Lobo ~~belt (see below)~~, ~~domain to the Iberian Pyrite belt (that includes massive sulphide~~  
162 ~~deposits)~~ ~~north~~, and the ~~Carboniferous flysch~~; ~~SPZ s. str. to the south (Fig. 1a, b)~~. The  
163 deformation in the SPZ consists in a south- to southwest-vergent fold and thrust belt with  
164 decreasing strain intensity and age southwards (Oliveira, 1990; Simancas et al., 2004). The  
165 metamorphic grade also decreases southwards, from epizone to diagenesis, through the SPZ  
166 (Munhá, 1990; Abad et al., 2001). ~~The Pulo do Lobo domain, which has been traditionally~~  
167 ~~considered as a suture-related unit (see below) is the focus of this work.~~

168

## 169 2.1. Pulo do Lobo ~~belt~~domain

170 ~~The northernmost unit of the SPZ is the Pulo do Lobo belt, whose evolution is intimately~~  
171 ~~related to the OMZ/SPZ suture (Fig. 1b).~~ ~~The Pulo do Lobo belt~~ ~~The Pulo do Lobo domain~~  
172 constitutes a polydeformed structure affecting low-grade Devonian-Carboniferous  
173 sedimentary formations. These formations are, from bottom to top (Fig. 1b-c):

174 (i) The Pulo do Lobo formation (s. str.), ~~which~~ is constituted by a succession of satiny black  
175 to grey phyllites and fine-grained schists with minor intercalations of quartz sandstones (Fig.  
176 2a). The presence of abundant segregated quartz veins (pre- to post-folding) is common. The  
177 palynological content suggests a middle Frasnian age (Pereira et al., 2018).

178 (ii) The Ribeira de Limas formation, ~~which~~ is constituted by phyllites with thin beds of quartz  
179 sandstones and arkoses (Fig. 2b). The presence of palynomorphs also suggests a middle  
180 Frasnian age for this formation (Pereira et al., 2018). The contact with the underlying Pulo  
181 do Lobo formation is gradual, with a progressive increase of sandstones and a decrease of  
182 phyllites upwards. For that reason, we will refer to the Pulo do Lobo and Ribeira de Limas  
183 formations as the lower formations of the Pulo do Lobo ~~belt~~domain. Furthermore, these  
184 lower formations share the same structure consisting in three fold-related foliations (Fig. 2a-  
185 b; Pérez-Cáceres et al., 2015). The first foliation of the lower formations ( $S_1$ ) is preserved  
186 inside microlithons of the second foliation ( $S_2$ ); usually, the angle between these two  
187 foliations is high.  $S_2$  is the main foliation and consists in a crenulation-dissolution cleavage  
188 that frequently appears as a milimetric- to centimetric-spaced tectonic banding. This foliation  
189 is axial-plane to north-vergent folds. The third foliation ( $S_3$ ) is a spaced crenulation-  
190 dissolution cleavage that sometimes develops a characteristic decimetric- to metric-scale  
191 tectonic banding.  $S_3$  is associated with upright to slightly south-vergent folds.

192 (iii) The Santa Iria formation, ~~which~~ is composed by alternating beds of slates and greywackes  
193 (Fig. 2c). The greywacke beds show normal grading and erosive base. Paleontological and  
194 palynostratigraphic studies suggest an Upper Famennian age for this formation (Pereira et  
195 al., 2008; 2018). However, an early Carboniferous age is much plausible, since more than  
196 90% of the palynomorphs correspond to reworked material (Lopes et al., 2014) and the

197 younger detrital zircon population is early Carboniferous (Braid et al., 2011; Pérez-Cáceres  
198 et al., 2017; Pereira et al., 2019). The Santa Iría formation only shows two foliations,  
199 correlative with the last two deformation phases in the lower formations. Therefore, an  
200 unconformity between them is inferred, which also agrees with the age and flysch character  
201 of the Santa Iría formation (Pérez-Cáceres et al., 2015). S<sub>2</sub> is observed as a penetrative slaty  
202 cleavage, while S<sub>3</sub> is a disjunctive crenulation cleavage.

203 According to ~~the evolutionary model proposed by Silva et al. (1990) and~~ Pérez-Cáceres et al.  
204 (2015), the two main foliations (S<sub>2</sub> and S<sub>3</sub>) in the Pulo do Lobo ~~belt~~domain resulted from the  
205 middle/upper Carboniferous collision between the OMZ and SPZ. On the contrary, the first  
206 foliation (S<sub>1</sub>) in the Pulo do Lobo ~~belt~~domain might have formed during the vanishing stages  
207 of Rheic Ocean subduction and/or the starting Variscan collision, probably at Late Devonian  
208 time.

209 The Pulo do Lobo ~~belt~~domain contains some decimetric- to metric-scale lenticular bodies of  
210 MORB-featured metamafic rocks ~~intercalated within~~. ~~At some outcrops, the mafic rocks are~~  
211 ~~embedded in a greenish detrital matrix, thus suggesting an olistostromic origin (the Peramora~~  
212 ~~Olistostrome; Eden and Andrews, 1990). These rocks are tectonically imbricated with~~ the  
213 phyllites of the Pulo do Lobo formation and ~~interpreted as~~hence forming a tectonic mélange  
214 (the so-called Peramora Mélange; Fig. 1b-c; ~~Apalategui et al., 1983;~~ Eden, 1991; Dahn et al.,  
215 2014). Based on this aspect and on the supposedly Rheic Ocean derived greenschists, the  
216 Pulo do Lobo ~~belt~~domain has been classically interpreted as a pre-collisional subduction-  
217 related accretionary prism (Eden and Andrews, 1990; Silva et al., 1990; Eden, 1991; Braid et  
218 al., 2010; Ribeiro et al., 2010; Dahn et al., 2014); ~~Quesada et al., 2019~~). However, the recently  
219 obtained Mississippian U/Pb zircon ages from the metamafic rocks (Dahn et al., 2014; Pérez-  
220 Cáceres et al., 2015) make difficult to maintain such hypothesis. More properly, they can be  
221 interpreted as mafic intrusions/extrusions in the frame of the intraorogenic transtensional  
222 magmatic event that prevailed in SW Iberia during the Mississippian. The metamafic rocks  
223 display a foliation (equivalent to the S<sub>2</sub> of the enveloping metasediments) developed at loosely  
224 constrained greenschist facies conditions. These rocks would have been imbricated with the  
225 Pulo do Lobo metasediments during the second deformation phase which caused S<sub>2</sub>  
226 ~~(Peramora Olistostrome; Pérez-Cáceres et al., 2015)~~. Our multidisciplinary metamorphic  
227 study of the Pulo do Lobo metasediments provides with crucial data concerning the tectonic  
228 significance of this ~~belt~~domain.

229

### 230 3. Samples and analytical methods

231 Eighteen samples were collected from well-exposed outcrops of phyllosilicate-rich detrital  
232 rocks of the Pulo do Lobo ~~belt~~domain along two north-south transects perpendicular to the  
233 structural trend. Five samples belong to the Santa Iría formation (unconformable upper  
234 formation) and thirteen to the lower formations (~~Pulo do Lobo and Ribeira de Limas~~  
235 ~~formations~~) (location of samples are in the map and cross-sections of Fig. 1b-c and the UTM  
236 coordinates in supplementary information). As a whole, the samples were selected in ~~not~~  
237 ~~non~~-altered outcrops, far from faults and joints, and were taken as homogeneous as possible.  
238 Sampling design was intended to collect representative sites, both of the overall stratigraphic  
239 succession and along the two transects. We also aimed to characterize the unconformity

240 between the lower and upper formations from a metamorphic point of view, since  
241 “crystallinity” aspect at first sight seems to be lower in the Santa Iría formation. Some  
242 samples from the lowermost Pulo do Lobo formation were collected not far from the  
243 metabasite lenses of the Peramora Mélange.

244 Samples were examined under the optical microscope and SEM scanning electron  
245 microscope (SEM) for overall mineralogy, deformation and minerals/ foliations relationships  
246 using an environmental scanning electron microscope FEI model Quanta 400, operating at  
247 15–20 keV (Centro de Instrumentación Científica-CIC, University of Granada, Spain).

248

249

### 250 3.1. X-Ray diffraction

251 Sample preparation and analysis by XRD were done in the laboratories of the Department  
252 of Mineralogy and Petrology of the University of Granada (Spain). After washing and  
253 cleaning of patinas and oxides, samples were crushed to a <2 mm fraction. The <2  $\mu\text{m}$   
254 fractions were separated by repeated extraction of supernatant liquid after centrifugation,  
255 according to the Stokes' law. Oriented aggregates were prepared by sedimentation on glass  
256 slides of whole-rock and <2  $\mu\text{m}$  fractions (the latter aims to minimize the content of detrital  
257 micas non-re-equilibrated during very low-grade metamorphism, which are generally larger  
258 than 2  $\mu\text{m}$ ; Moore and Reynolds, 1997). Samples were also treated with ethylene glycol  
259 (EGC) to identify illite/smectite or chlorite/smectite mixed-layers on the basis of their  
260 expansibility. Samples were analyzed using a PANalytical X'Pert Pro powder diffractometer  
261 equipped with an X'Celerator detector,  $\text{CuK}\alpha$  radiation, operated at 45 kV and 40mA, Ni  
262 filter and 0.25° divergence slit. The resulting diffraction diagrams were examined to extract  
263 information on mineralogy based on their characteristic reflections and white mica crystal  
264 data.

265 The Illite “Crystallinity” index (Kübler Index; KI; Kübler, 1968) has been estimated from  
266 the measurement of the full peak-width of K-white mica at half maximum intensity (FWHM  
267 values), expressed as  $\Delta^{\circ}2\theta$  of the Bragg angle. Preparation of samples and experimental  
268 conditions were carried out according to IGCP 294 IC Working Group recommendations  
269 (Kisch, 1991). A step increment of 0.008°  $2\theta$  and a counting time of 52 s/step were used in  
270 the diffractometer. The KI has been measured in all samples for both the 5 and 10 Å  
271 reflection peaks of K-white mica in order to identify possible effects of other overlapping  
272 phases (Nieto and Sánchez-Navas, 1994; Battaglia et al., 2004). Some XRD traces showing  
273 complex mixture of mixed-layered minerals were decomposed with the MacDiff software  
274 (Petschick, 2004). The FWHM values obtained in the laboratory (x) have been transformed  
275 to Crystallinity Index Standard (CIS) values (y) using the equation  $y=0.972x + 0.1096$  ( $R^2 =$   
276 0.942), obtained from the measure in our lab of the international standards of Warr and Rice  
277 (1994). Finally, they have been expressed in term of traditional KI values using the equation  
278 of Warr and Ferreiro Mähnlmann (2015; ‘CIS’ = 1.1523\*Kübler index ‘Basel lab’ + 0.036).  
279 The lower and upper boundaries of the anchizone in the KI scale are 0.42 and 0.25 °2 $\theta$ ,  
280 respectively (Warr and Ferreiro Mähnlmann, 2015). The thermal range for the anchizone is



281 estimated in c. 200-300 °C, though the KI cannot be considered as a true geothermometer  
282 (Frey, 1987; Kisch, 1987).

283 The *b*-cell parameter of white mica was obtained from the (060) reflection peak measured  
284 with quartz as internal standard on polished rock-slices cut normal to the sample main  
285 foliation (Sassi and Scolari, 1974). The *b*-cell dimension of K-white mica is often proportional  
286 to the magnitude of phengitic substitution and therefore considered as a proxy of the  
287 pressure conditions during its crystallization. Thus, Guidotti and Sassi (1986) have shown  
288 that *b* values lower than 9.000 Å are typical of low-pressure facies conditions, while *b* values  
289 higher than 9.040 Å are related to rather high-pressure facies metamorphism. Precise  
290 measurements of the basal spacing of white mica ( $d_{001}$ ) have also been made, using quartz  
291 from the sample itself as internal standard.  $d_{001}$  is related to the paragonitic Na/K substitution  
292 (Guidotti et al., 1992), thereby approximately reflecting the temperature of [white-mica](#)  
293 formation (Guidotti et al., 1994).

294

### 295 3.2. EPMA-derived X-Ray compositional maps and chlorite thermometry

296 From all of the collected samples, we selected those with the larger phyllosilicate grain-size  
297 for electron probe microanalysis (EPMA). Thus, three carbon-coated polished thin-sections  
298 were studied. The selected samples (PLB-84, PLB-88 and PLB-93) belong to the lower  
299 formations of the Pulo do Lobo [belt domain](#) (Fig. 2d-e). The Santa Iria samples could not be  
300 studied due to the tiny grain size of the slaty minerals (commonly less than 3 µm).

301 Compositional maps and accurate spot analyses were performed on a JEOL JXA-8230  
302 EPMA at the Institut des Sciences de la Terre (ISTerre) in Grenoble (France), according to  
303 the analytical procedure proposed by de Andrade et al. (2006) and Lanari et al. (2014a). The  
304 data acquisition was made in wavelength dispersive spectrometry mode (WDS). Ten  
305 elements (Si, Ca, Al, K, Mn, Na, P, Ti, Fe and Mg) were analyzed using five WD  
306 spectrometers: TAP crystal for Si and Al, PETL for Ti and P, TAPH for Na and Mg, PETH  
307 for K and Ca, and LIFH for Mn and Fe. The standardization was made by using certified  
308 natural minerals and synthetic oxides: [Wollastonite](#)[wollastonite](#) (Si, Ca),  
309 [Corundum](#)[corundum](#) (Al), [Orthoclase](#)[orthoclase](#) (K), [Rhodonite](#)[rhodonite](#) (Mn), [Albite](#)[albite](#)  
310 (Na), [Apatite](#)[apatite](#) (P), [Rutile](#)[rutile](#) (Ti), [Hematite](#)[hematite](#) (Fe), and [Periclase](#)[periclase](#) (Mg).  
311 X-Ray maps were obtained by adding successive adjacent profiles. Beam current of 100 nA  
312 and beam size spot (focused) were used. The step (pixel) size was 1 µm and dwell time was  
313 200-300 msec per pixel. Spot analyses were obtained along the profiles within the mapping  
314 at 15 kV accelerating voltage, 12 nA beam current and 2 µm beam size spot (focused). The  
315 on-peak counting time was 30 sec for each element and 30 sec for two background  
316 measurements at both sides of the peak. ZAF correction procedure was applied. The internal  
317 standards were orthoclase and/or chromium-augite (Jarosewich et al., 1980), which were run  
318 (3 points on each standard) after each profile in order to monitor instrumental drift and  
319 estimate analytical accuracy. Drift correction was made, if necessary, using the corresponding  
320 regression equation.

321 The WDS X-Ray maps were then processed with XMapTools  
322 (<http://www.xmaptools.com>), a MATLAB©-based graphical user interface program to



323 process the chemical maps, link them to thermobarometric models and estimate the  
324 pressure-temperature conditions of crystallization of minerals in metamorphic rocks (Lanari  
325 et al., 2014a). The compositional maps were standardized with the spot analyses measured  
326 along the profiles and mineral compositions were plotted into binary and ternary diagrams  
327 using the interface modules *Chem2D* and *Triplot3D*. Chemical maps of amount of tetrahedral  
328 aluminum ( $Al^{IV}$ ) of chlorites were acquired, because is at the base of many empirical chlorite  
329 thermometers (e.g. Cathelineau and Nieva, 1985; Cathelineau, 1988). The temperature  
330 conditions were estimated for each chlorite pixel of the maps using the chlorite thermometer  
331 of Lanari et al. (2014b), as well as the approaches of Vidal et al. (2006) and Bourdelle et al.  
332 (2013), which are summarized in the supplementary information.

333 In addition to the above mentioned compositional maps, white micas from seven carbon-  
334 coated thin sections of the lower formations of the Pulo do Lobo ~~belt~~domain were analyzed  
335 before with a Jeol WDS four-spectrometer microprobe (JXA-8200 Superprobe) at the  
336 University of Huelva (Spain). A combination of silicates and oxides were used for  
337 calibration: ~~standards used were wollastonite (Si and Ca), potassium feldspar (Al, K and Na),~~  
338 ~~forsferite (Mg) and fayalite (Fe).~~ Single point analyses were obtained with ~~4020~~ nA probe  
339 current, 1-5  $\mu$ m spot size; and ~~2015~~ kV of acceleration voltage, ~~with 5 s counting times.~~

340

### 341 3.3. Raman Spectroscopy of carbonaceous material

342 ~~Beysac et al. (2002a) calibrated a technique for the quantification of peak metamorphic~~  
343 ~~temperature, which can be used even in the absence of specific mineral assemblages~~  
344 ~~necessary for classical thermobarometric estimates. This technique,~~ Raman Spectroscopy of  
345 Carbonaceous Material (RSCM), is based on the observation that sedimentary carbonaceous  
346 material (CM) is progressively transformed into graphite at increasing temperature. ~~Beysac~~  
347 ~~et al. (2002a) found a linear relationship between temperature and the structural state of CM~~  
348 ~~quantified by Raman microspectroscopy.~~ Because of the irreversible character of  
349 graphitization, CM structure is not sensitive to the retrograde path during exhumation of  
350 rocks, but only depends on the maximum temperature reached during metamorphism  
351 (Beysac et al., 2002a). Temperature can be determined in the range 330-650°C with a  
352 calibration-attached accuracy of  $\pm 50$  °C due to uncertainties on petrologic data used for the  
353 calibration. Relative uncertainties on temperature are, however, much smaller (around 10-15  
354 °C; Beysac et al., 2004). For temperature below 330 °C, Lahfid et al. (2010) performed a  
355 systematic study of the evolution of the Raman spectrum of CM in low-grade metamorphic  
356 rocks in the Glarus Alps (Switzerland). They showed that the Raman spectrum of CM is  
357 slightly different from the spectrum observed at higher temperature and they established a  
358 quantitative correlation between the degree of ordering of CM and temperature.

359 In this work, twelve representative thin-sections previously examined by optical microscopy  
360 were selected. From them, ten samples were finally analyzed: ~~(according to their larger CM~~  
361 ~~grain-size and content):~~ eight samples belong to the lower formations (Pulo do Lobo and  
362 Ribeira de Limas formations), while the other two belong to the Santa Iría formation.  
363 Polished thin-sections cut perpendicularly to the foliation were analyzed at the Institut de  
364 Minéralogie, de Physique des Matériaux et de Cosmochimie at the Sorbonne University of  
365 Paris (France). We followed closely the analytical procedure described by Beysac et al.

366 (2002a, b; 2003; see supplementary information). More than 15 Raman spectra (Fig. 3) were  
367 obtained for each sample using a Renishaw InVIA Reflex microspectrometer  
368 ~~equiped~~equipped with a 514.5 nm Modulaser argon laser under circular polarization. The  
369 laser was focused by a DMLM Leica microscope, and laser power was set below 1 mW at  
370 the sample surface. The Rayleigh diffusion was eliminated by edge filters and the signal was  
371 dispersed using a 1800 g/mm grating and finally analyzed by a Peltier cooled RENCAM  
372 CCD detector. The recorded spectral window was large to correctly set the background  
373 correction, from 700 to 2000  $\text{cm}^{-1}$  in case of low-temperature samples. Before each session,  
374 the spectrometer was calibrated with a silicon standard. CM was systematically analyzed  
375 behind a transparent adjacent mineral, generally quartz or white mica grains oriented along  
376  $S_1$ . For a full description of the temperature calculations see the supplementary information.

377

## 378 4. Results

379 ~~According to SEM analysis~~According to the petrographic study, all the samples correspond  
380 to slates or phyllites with phyllosilicates smaller than 500  $\mu\text{m}$ , composed of variable quartz  
381 + K-white mica  $\pm$  chlorite  $\pm$  feldspar  $\pm$  ore and accessory minerals (Fig. 2d-f). Samples from  
382 the Santa Iría formation have much smaller grain-size and apparently lower “crystallinity”  
383 (Fig. 2f). The first foliation  $S_1$  is defined by the largest micas and chlorites (Fig. 2d-e), being  
384 folded by microscopic- to centimetric-scale tight folds of the second deformation phase (Fig.  
385 2a-b, d-e). The second foliation  $S_2$  is the main foliation at outcrop (Fig. 2a-c), but the  
386 development of phyllosilicates (mostly white mica) is lesser than  $S_2$ . The third foliation  $S_3$  is  
387 much less penetrative (Fig. 2a-c) and does not develop phyllosilicates. ~~Large detrital~~  
388 ~~phyllosilicate clasts have not been observed.~~

389

### 390 4.1. X-Ray diffraction

391 The mineralogy and crystal parameters of K-white mica obtained from the 18 samples of the  
392 Pulo do Lobo ~~belt~~domain are summarized in Table 1. The results of KI values, b-cell  
393 parameter and  $d_{001}$  analyzed in K-white mica, obtained from whole-rock and  $<2 \mu\text{m}$  fractions  
394 are very similar, which suggests that detrital micas re-equilibrated during metamorphism.

395 The mineralogy of the samples is relatively simple: Qz + Ms + Fsp+ Chl  $\pm$  Pg  $\pm$  C/S. The  
396 slates of the Santa Iría formation have quartz, muscovite and chlorite, with chlorite/smectite  
397 interlayers (C/S) in some samples. In the lower formations, besides quartz and muscovite,  
398 chlorite is present in almost all of the samples, paragonite appears in most of them, and  
399 chlorite/smectite interlayers are occasional.

400 KI values measured in the 10 Å peak of white mica from the  $<2 \mu\text{m}$  fraction are shown in  
401 Table 1 and Fig. 1c with a relative colour bar from orange (lower values) to green (higher  
402 values). Values of the Santa Iría samples (n=5) range from 0.20 to 0.26  $\Delta^\circ 2\theta$ , the mean value  
403 being 0.23 (standard deviation 0.02). As for the lower formations (n=12), KI values range  
404 from 0.17 to 0.22, the mean value being 0.19 (standard deviation 0.02). KI values measured  
405 in the 5 Å peak (not shown) are very similar to those of the 10 Å peak.

406 The measured *b*-cell parameter of white mica varies in a close range around 9 Å (8.991-9.002).  
407 Mean value is 8.995 Å (standard deviation 0.003) for the Santa Iría formation samples, and  
408 8.997 Å (standard deviation 0.003) for the samples of the lower formations. *d*<sub>001</sub> values  
409 average 9.992 Å (standard deviation 0.004) and differ slightly between upper and lower  
410 formations, being higher in the upper formation.

411 The results obtained through X-Ray diffraction denote ~~very low to~~ low-grade metamorphic  
412 conditions due to the ~~presence of C/S and~~ KI values between 0.17-0.26 Δ°2θ. In addition,  
413 *b*-cell parameters ~~are lower than 9.000 Å which~~ show a low-pressure metamorphic gradient-  
414 (low pressure/temperature metamorphic facies conditions; Guidotti and Sassi, 1986).

415

#### 416 4.2. Compositional maps and chlorite thermometry

417 X-Ray maps show the distribution of major elements and allow identifying white mica,  
418 chlorite, and some albite porphyroblasts, with ilmenite and rutile as accessory minerals (Fig.  
419 4a-b). Although quartz is abundant in all of the samples, the zoomed selected areas for X-  
420 ray mapping (composed mostly by phyllosilicates) do not contain quartz (Fig. 4a-b). White  
421 mica is abundant along both S<sub>1</sub> and S<sub>2</sub> foliations (Fig. 2d-e and 4b). Chlorite is found mostly  
422 along S<sub>1</sub>, being very scarce and small-sized along S<sub>2</sub> (Fig. 2e and 4b), with the exception of  
423 sample PLB-93 where chlorite is similar in amount in both foliation domains (Fig. 4b).

424 Mapped compositions of end-members of white mica and chlorite have been plotted in the  
425 ternary diagrams of Figure 5. The composition of white mica is similar in the three maps. It  
426 is close to muscovite, with 25% of pyrophyllite and very scarce celadonite content (0-10%;  
427 Fig. 5a). The high content of pyrophyllite (high amount of interlayer vacancies) is typical of  
428 low-pressure ~~illitic-mica~~ compositions. Figure 6 shows white mica compositional ratios,  
429 which can be related to P/T conditions: they present low degree of Na substitution and low  
430 phengitic component, thus being close to the muscovite end-member. These results point to  
431 low-pressure conditions and agree well with XRD results: low *b*-cell parameter ( $\leq 9.000$  Å)  
432 and high *d*<sub>001</sub> ( $\geq 9.985$  Å; Table 1).

433 Chlorite compositions are variable, though all of them have in common ≈50% clinocllore  
434 + daphnite and ≈50% amesite + sudoite (Fig. 5b). Chlorites in sample PLB-88 are poor in  
435 amesite with a large variation of clinocllore + daphnite and sudoite. In sample PLB-84  
436 chlorites, variable compositions between amesite and sudoite indicate a variation of Al<sup>IV</sup>,  
437 which implies an increase of temperature from rims to cores as shown in the chemical maps  
438 of Fig. 4c. Finally, PLB-93 chlorites are poor in sudoite and higher in Al<sup>IV</sup> content, thus  
439 suggesting higher average temperatures- (Vidal et al., 2006). Altogether, chlorite  
440 compositional data suggest the presence of two end-members: sudoite-rich low-temperature  
441 (PLB-88), and amesite-rich high-temperature (PLB-93).

442 Maps of Al<sup>IV</sup> in chlorites have been represented in Fig. 4c. Sample PLB-88 shows lower Al<sup>IV</sup>  
443 content (≈1.1-1.3 apfu) than sample PLB-93 (≈1.3-1.5 apfu). In sample PLB-84, some large  
444 chlorite grains oriented along S<sub>1</sub> are zoned, with higher Al<sup>IV</sup> content in the cores (≈1.4 apfu)  
445 than in the rims (≈1.0 apfu; see white square in Fig. 4c). According to the empirical  
446 calibration of Cathelineau (1988), Al<sup>IV</sup> in chlorites increases with temperature. Thus, the Al<sup>IV</sup>

447 content in chlorites manifests different temperatures in different samples, and also from core  
448 to rim in singular grains.

449 Temperature maps have been obtained with the semi-empirical thermometer of Lanari et al.  
450 (2014b), assuming that  $\text{Fe}^{2+}$  is the Fe total (Fig. 4d). Temperatures range between 100-200  
451 °C in sample PLB-88, 150-350 °C in sample PLB-84, and 200-450 °C in sample PLB-93.  
452 Tiny chlorites developed along  $S_2$  show lower temperatures than larger and more abundant  
453 chlorites along  $S_1$ , with the exception of sample PLB-93. Furthermore, some large chlorites  
454 oriented along  $S_1$  are zoned, showing high-temperature relic cores (350-450 °C; see white  
455 insets in Fig. 4c-d) surrounded by low-temperature rims (150-250 °C).

456 To test Vidal et al. (2005, 2006) and Bourdelle et al. (2013) approaches, an area of  
457 representative chlorites in an  $S_1$  microlithon was selected from each map (see red insets in  
458 Fig. 4d). Corresponding chlorite compositions were extracted and introduced in the chlorite-  
459 quartz-water equilibria (Fig. 7a, Vidal et al., 2005, 2006; Fig. 7b, Bourdelle et al., 2013). The  
460 temperature estimates (Fig. 7) are fairly similar with both methods, averaging 120-230 °C in  
461 sample PLB-88 and 150-380 °C in sample PLB-84. This is also in agreement with the  
462 temperature maps calculated with the Lanari et al. (2014a) model. Only the sample PLB-93  
463 shows a divergence on temperature averages: mostly ~~200~~150-250 °C with the thermometer  
464 of Bourdelle et al. (2013), and 250-350 °C with the one of Vidal et al. (2005, 2006).  
465 ~~Nevertheless, the Bourdelle thermometer predicts temperatures up to 380-400°C.~~ In both  
466 cases, ~~(Bourdelle et al. (2013) and Vidal et al. (2005, 2006) approaches),~~ the higher  
467 temperature analyses are obtained from crystal cores and belong mostly to the sample PLB-  
468 93.

469

### 470 4.3. RSCM thermometry

471 The ratio parameters and corresponding maximum temperatures obtained from all the  
472 spectra analyzed are shown in the supplementary information. The Raman spectra were  
473 decomposed into bands following the appropriate fitting procedure described in Beyssac et  
474 al. (2002a) for the lower formations (high-temperature Raman spectra; ratio parameter R2)  
475 and Lahfid et al. (2010) for the Santa Iria formation (low-temperature Raman spectra; ratio  
476 parameters RA1 and RA2; Fig. 3). The average temperatures are shown in Table 1 and Fig.  
477 1c with a relative colour bar from red (higher temperature) to blue (lower temperature). The  
478 average temperatures for the lower formations range from 420 to 530 °C, with a mean value  
479 of 468 °C (standard deviation of 35). The highest temperatures are found in samples PLB-  
480 82 (530 °C) and PLB-93 (495 °C), while the remaining ones do not exceed 480 °C. As for  
481 the Santa Iria formation, temperatures are lower (315-330 °C; Table 1) than in the underlying  
482 formations.

483

## 484 5. Interpretation and discussion

### 485 5.1. Deformation/metamorphism relationships

486 The obtained analytical results must be interpreted in the context of the Variscan evolution  
487 of the Pulo do Lobo ~~beltdomain~~. As described above, two regional deformational events  $D_1$

488 and D<sub>2</sub> gave way to the development of foliations (Devonian S<sub>1</sub> and Carboniferous S<sub>2</sub>)  
489 accompanied by metamorphic phyllosilicate growth (M<sub>1</sub> and M<sub>2</sub>). In the cross-sections of  
490 Fig. 1c, KI values derived from XRD and average temperature from RSCM ~~are represented.~~  
491 ~~The suggest that the~~ lowest metamorphic grade (green and blue colours) corresponds to the  
492 Santa Iria formation. ~~Moreover, Table 2 summarizes the relationship between deformation~~  
493 ~~and metamorphism of the Pulo do Lobo belt in the context of the Variscan tectonic~~  
494 ~~evolution of SW Iberia (Pérez-Cáceres et al., 2015).~~

495 The textural observations evidence that in most samples of the lower formations M<sub>1</sub> was the  
496 main crystallization event, developing abundant and large-sized white mica and chlorite in S<sub>1</sub>  
497 microlithons, while M<sub>2</sub> gave way to small-sized white mica (e.g., Fig. 2e and map 1 in Fig. 4).  
498 On the other hand, polydeformed rocks commonly show previously grown minerals rotated  
499 towards a new foliation developed at lower-grade conditions, without new crystallization.  
500 This can be the case of the white micas that define S<sub>2</sub> in some samples (illustrated in Fig. 2d),  
501 which, in turn, is not contradictory with the similar chemical composition of S<sub>1</sub> and S<sub>2</sub> micas  
502 (Fig. 5a). As shown in ~~our~~ these samples, S<sub>1</sub> is variably crenulated by D<sub>2</sub>, so that M<sub>1</sub> minerals  
503 are variably rotated towards S<sub>2</sub>. Consequently, the metamorphic data obtained from the  
504 samples of the lower formations will be ascribed to D<sub>1</sub>-M<sub>1</sub>. Sample PLB-93 might represent  
505 an exception, since its slightly higher RSCM and chlorite-derived temperatures might be due  
506 to nearby intrusions (Fig. 1b and 1c.1). At this respect, it is important to note the  
507 Mississippian transtensional event (basins development and abundant mafic magmatism)  
508 that took place between D<sub>1</sub> and D<sub>2</sub> (Pérez-Cáceres et al., 2015). The characterization of M<sub>2</sub>  
509 can be done by studying the samples from the Santa Iria formation, which are only affected  
510 by S<sub>2</sub> accompanied by small-sized phyllosilicate growth (Fig. 2f). No crystallization has been  
511 observed related to the S3 disjunctive crenulation cleavage.

512

## 513 5.2. First tectonothermal event (Devonian M<sub>1</sub>)

514 The observed mineral association (Qz + Ab + Ms + Chl ± Pg), together with the presence  
515 of C/S is compatible with low-grade metamorphic conditions (Table 1). White mica  
516 “crystallinity” values (0.17-0.22 Δ°2θ; average 0.19) are always in the range of the epizone  
517 (low-grade or greenschists facies; >300 °C; Frey, 1987; Kisch, 1987, Warr and Ferreiro  
518 Mähnlmann, 2015), in accordance with the values reported by Abad et al. (2001) in a more  
519 general study of the diagenetic-metamorphic evolution of the South Portuguese Zone  
520 metapelites. Nevertheless, both the values of KI, still far from 0.14 Δ°2θ, (high epizone  
521 conditions according to Abad et al., 2006), and their variability, suggest that temperature was  
522 not high enough as to stabilize a highly crystalline white mica ~~at high epizone conditions~~  
523 ~~(Abad et al., 2006).~~ This is in agreement with the low Na content of K-micas coexisting with  
524 paragonite (Fig. 6), meaning a very-low temperature position in the muscovite-paragonite  
525 solvus for natural quasi-binary Pg-Ms pairs (Guidotti et al., 1994). By contrast, the maximum  
526 temperatures obtained with RSCM geothermometry are surprisingly high (420-530 °C;  
527 average 470 °C; corresponding to very high epizone or even medium-grade conditions; Table  
528 1).

529 The composition of paired chlorite and white mica is normally used to calculate pressure and  
530 temperature (e.g., Vidal et al., 2006), but multi-equilibrium approach was not successful

531 because the P-T equilibrium conditions did not converge. This result is indicative of chemical  
532 disequilibrium, precluding their use as a reliable geothermobarometer in this case. The  
533 temperatures calculated from chlorite compositions following various approaches (Vidal et  
534 al., 2006, Fig. 7a; Bourdelle et al., 2013, Fig. 7b; Lanari et al., 2014a, Fig. 4d) are as follow:  
535 ~~120-100~~-230 °C for sample PLB-88, ~~150-380~~~~375~~ °C for sample PLB-84, and ~~250-400~~~~150-450~~  
536 °C for sample PLB-93 ~~and a small population of chlorite cores from sample PLB-84~~ (Figs.  
537 ~~4d~~ and 7, and Table 1). The slightly higher temperature of sample PLB-93 is inferred from  
538 its highest white mica “crystallinity” (0.17  $\Delta^{\circ}2\theta$ ), high RSCM temperature (495 °C), high-  
539 temperature (amesite-rich) chlorite and higher chlorite thermometry (Table 1), and can be  
540 explained by its nearness to metric-scale mafic igneous bodies of the Peramora Mélange  
541 (located at  $\approx$ 200 m to the south; Pérez-Cáceres et al., 2015) and/or to a granite stock (located  
542 at  $\approx$ 5 km to the west) (Fig. 1b).

543 In our samples there is some evidence of chlorite retrogression: (i) the chemical  
544 disequilibrium showed by the white mica/chlorite geothermobarometer, (ii) the presence of  
545 C/S mixed layers not stable in the epizone (e.g. Potel et al., 2006), (iii) the difference between  
546 temperature estimates from crystal rims to cores, and the higher temperature relic cores  
547 preserved in large chlorites defining  $S_1$  (Fig. 4c-d), and (iv) the previously reported XRD and  
548 TEM data of chlorite retrograded to smectite and corrensite in the Pulo do Lobo ~~belt~~~~domain~~  
549 (see fig. 1 in Nieto et al., 2005). The existence of chlorites with different compositions  
550 crystallized at different temperatures is the usual scenario (e.g., Vidal et al., 2006, 2016; Lanari  
551 et al., 2012; 2014a and b; Grosch et al., 2012; 2014; Cantarero et al., 2014). In such situation,  
552 the definition of a single temperature and pressure attributable to peak conditions is really  
553 difficult. The maximum temperature showed by chlorite relic cores is 350-450 °C (Fig. 4d),  
554 which is more in accordance with the conditions estimated for  $M_1$  by means of ~~white mica~~  
555 “crystallinity” and RSCM data.

556 An issue that deserves some discussion is the difference in temperature estimates between  
557 RSCM and other techniques. RSCM thermometry records the peak temperature and is not  
558 sensitive to the retrograde path. Alternatively, other methods based on phyllosilicate  
559 compositions are prone to record reequilibration during the retrograde path; thus, they rarely  
560 record the peak conditions, except perhaps in the core of certain large crystals. Therefore,  
561 RSCM and phyllosilicate-based methods do not record the same information on  
562 temperature, being in fact complementary. The analyzed CM grains were carefully  
563 checked by microtextural observation and spectral geometry to make sure that these grains  
564 are actually derived from in situ organic matter graphitized during metamorphism.

565 In our case study, at the high peak temperature given by the RSCM thermometry, minerals  
566 such as biotite or garnet are expected to crystallize in metasediments, though they have not  
567 been observed in our samples. The absence of such minerals Biotite has been said to exist in  
568 a few previous works (Apalategui et al., 1983; Braid et al., 2010; Rubio Pascual et al., 2013).  
569 However, in a few of our samples, biotite-looking crystals have resulted to be oxichlorites  
570 under SEM analyses. The absence or exceptional presence of biotite can be due to whole-  
571 rock composition, and explained by growth inhibition related to Na-excess, as evidenced by  
572 the presence of albite and paragonite in our samples. Another possible explanation could be  
573 the higher sensitivity of CM graphitization to fast reequilibration during a short-time thermal  
574 event. Thus, the Mississippian intrusions subsequent to  $M_1$  in the Pulo do Lobo formation



575 (see description in section 2) could have exerted a fast and locally intense thermal imprint  
576 that influenced CM but not the crystal chemistry of silicates. Moreover, recrystallization  
577 processes are not only function of temperature, but also promoted by deformation/stress,  
578 time, fluid/rock ratio (Merriman and Frey, 1999). Observations of this kind (differing  
579 reaction kinetics between organic and inorganic material (e.g. illite) in a contact metamorphic  
580 setting can be found in Olsson (1999) and Abad et al. (2014). Regarding the time of geological  
581 processes, Mori et al. (2017) investigated the importance of heating duration for RSCM  
582 thermometry by studying graphitization around dykes. They showed that small-scale  
583 intrusions generating short thermal events modify the structure of CM in the surrounding  
584 rocks, to conclude that CM crystallinity is clearly related to contact metamorphism. The  
585 influence of low-pressure contact aureoles on RSCM temperature patterns is further  
586 supported by the results obtained by Hilchie and Jamieson (2014), who concluded that the  
587 variation of RSCM temperatures can be controlled by the subsurface geometry of a pluton.  
588 Finally, the long-distance thermal influence of plutonic intrusions on low-grade rocks located  
589 as far as 10 km has already been evidenced (e.g., Merriman and Frey, 1999; Martínez Poyatos  
590 et al., 2001) and could also be recorded by RSCM thermometry in our samples.

591

### 592 5.3. Second tectonothermal event (middle/upper Carboniferous M<sub>2</sub>)

593 The mineralogy of the Santa Iría samples (Qz + Fsp + Ms + Chl ± C/S) is compatible with  
594 very low- to low-grade conditions. The K-white mica “crystallinity” values (0.20-0.26 Δ°2θ;  
595 average 0.23) point to lower epizone conditions, very close to the boundary with the  
596 anchizone (≈300 °C; Frey, 1987; Kisch, 1987). The temperatures calculated by RSCM in two  
597 samples (315 and 330 °C) are compatible with the KI data of XRD analysis.

598 Our metamorphic data corroborate the existence of an unconformity between the lower and  
599 upper formations of the Pulo do Lobo ~~belt~~ (Pérez-Cáceres et al., domain (Pérez-Cáceres et  
600 al., 2015). Table 2 summarizes the relationship between deformation and metamorphism of  
601 the Pulo do Lobo domain in the context of the Variscan tectonic evolution of SW Iberia  
602 (Pérez-Cáceres et al., 2015). The lower formations record a Devonian tectonothermal event  
603 that reached epizone or lower greenschist facies conditions (M<sub>1</sub> with generalized  
604 phyllosilicate growth at temperatures as high as 450 °C), while the overlying upper formation  
605 records a middle/upper Carboniferous tectonothermal event close to the anchizone/epizone  
606 boundary (M<sub>2</sub> with small-sized phyllosilicate growth at temperatures ≈300-330 °C; Table 1).  
607 Obviously, M<sub>2</sub> also affected somehow the lower formations, being, at least in part, the  
608 responsible for the observed retrogression of M<sub>1</sub> chlorite and/or crystallization of new  
609 chlorites at lower temperature.

610

### 611 5.4. Pressure conditions

612 The measured *b*-cell parameters of K-white mica (in a short range between 8.991-9.002 Å;  
613 average 8.996; standard deviation 0.003) are very similar in the lower and upper formations  
614 of the Pulo do Lobo ~~belt~~ domain. Thus, the *b* parameter is consistently homogeneous and  
615 reflects very low phengite substitution in mica, as expected at low-pressure settings (Potel et  
616 al., 2006, 2016), near the intermediate pressure gradient boundary (Guidotti and Sassi, 1986).



617 In agreement with the low *b*-cell parameters, the composition of K-white mica is close to  
618 muscovite with very low celadonite and higher pyrophyllite content (Fig. 5a), as expected for  
619 illite-rich mica formed at low-pressure gradients. In the case of high- or medium-pressure  
620 conditions, a continuous trend in mica compositions would be found reflecting the  
621 decompression path after the peak pressure, while the *b*-cell parameter would represent an  
622 average value of the range of mica compositions found in the sample (Abad et al., 2003b).  
623 On the contrary, at low-pressure settings, the overall range of recorded pressure is very short  
624 and micas present similar compositions and *b*-cell parameters among the various samples, as  
625 in the case of the Pulo do Lobo samples (Figs. 5a and 6, and Table 1).

626 The Pulo do Lobo ~~belt~~domain has been classically interpreted as a pre-collisional subduction-  
627 related accretionary prism, based on the MORB geochemistry of their mafic rocks (see  
628 section 2.1). According to this classical interpretation, features typical of modern subduction  
629 systems should be expected, such as high-pressure metamorphic gradient remnants of partial  
630 subduction/exhumation in an accretionary wedge (e.g., Platt, 1986; Ernst, 2005), or slices of  
631 oceanic slab-derived lithologies (varied mid-ocean ridge metaigneous lithologies and also  
632 deep ocean bottom metasediments). Thus, recent works on the Makran accretionary prism  
633 (Omran et al., 2017) and the subduction system of Japan (Endo and Wallis, 2017) describe  
634 an accretionary mélange complex composed of pelagic sedimentary rocks, ophiolites,  
635 greenschists, amphibolites, and blueschists with high-pressure minerals such as lawsonite and  
636 glaucophane. On the contrary, most of the geological data concerning the Pulo do Lobo  
637 ~~belt~~domain do not back up such interpretation (see section 2.1), and our new results about  
638 pressure conditions are also in disagreement. The only suspect of high-pressure gradient in  
639 the Pulo do Lobo ~~belt~~domain is the interpretation of some rhomboidal aggregates of  
640 epidote porphyroblasts as the remnants of supposed lawsonite grown previously to S<sub>2</sub> in some  
641 samples of Pulo do Lobo mafic schists (Rubio Pascual et al., 2013). However, no analytical  
642 data have been presented to support the lawsonite pseudomorphs.

643

## 644 6. Conclusions

645 Eighteen samples of metapelites from the Pulo do Lobo ~~belt~~domain have been studied to  
646 characterize their Variscan low-grade metamorphism. The microstructural analysis of the  
647 samples of the lower formations (Devonian Pulo do Lobo and Ribeira de Limas) shows the  
648 existence of two superposed low-grade tectonothermal events with associated foliation and  
649 phyllosilicate growth (S<sub>1</sub>-M<sub>1</sub> and S<sub>2</sub>-M<sub>2</sub>; Table 2). M<sub>2</sub> was less intense, being the only event  
650 that affected the overlying Carboniferous Santa Iria formation. The regional geology also  
651 shows that a Mississippian thermal (magmatic-derived) event occurred in-between M<sub>1</sub> and  
652 M<sub>2</sub>.

653 M<sub>1</sub> and M<sub>2</sub> correspond to the chlorite zone, but M<sub>1</sub> entered the epizone (greenschists facies  
654 with temperatures up to ≈450 °C), while M<sub>2</sub> did not exceed the anchizone-epizone boundary  
655 (≈300 °C).

656 The temperatures obtained from RSCM are higher compared to the ones derived from  
657 chlorite geothermometry and white mica data. The discrepancy can be explained by the fact  
658 that RSCM records the true maximum temperature, being not affected by retrogression as

659 other methods do. In addition, this difference can be the consequence of the high sensitivity  
660 of CM to quickly equilibrate at maximum temperatures during short thermal events due to  
661 magmatic intrusions emplaced during the Mississippian thermal event.

662 Thermodynamic disequilibrium between white mica and chlorite has precluded their use for  
663 geothermobarometry, and a variety of data (including the existence of relic high-temperature  
664 chlorite cores, the presence of chlorite/smectite mixed layers, or the very-low temperatures  
665 calculated with chlorite geothermometers) indicate chlorite retrogression after M<sub>1</sub>  
666 metamorphic climax and crystallization of new chlorite grains at lower temperature.

667 The low-pressure conditions derived from white mica indicators (very low celadonite content  
668 and *b*-cell values) are incompatible with the high-pressure metamorphic gradient expected in  
669 a subduction-related accretionary wedge, which has been the classical interpretation of the  
670 Pulo do Lobo [belt domain](#).

671

672

### 673 Acknowledgements

674 This work was supported by the projects CGL2011-24101 (Spanish Ministry of Science and  
675 Innovation), CGL2015-71692-P and CGL2016-75679-P (Spanish Ministry of Economy and  
676 Competitiveness), RNM-148 and RNM-179 (Andalusian Government) and BES-2012-  
677 055754 (Doctoral scholarship to I. Pérez-Cáceres from the Spanish Ministry of Science and  
678 Innovation). The Raman facility in Paris has been funded by the City of Paris (Emergence  
679 program). We thank Valérie Magnin for her assistance with the microprobe analysis in  
680 Grenoble and Pierre Lanari for his support with thermodynamic software. [Detailed revisions](#)  
681 [by C. Quesada and an anonymous reviewer contributed to improve this paper.](#)

682

### 683 Figure captions

684 **Figure 1.** a) Location of the studied area in the SW of the Iberian Massif (in grey). CIZ: Central  
685 Iberian Zone, OMZ: Ossa-Morena Zone, SPZ: South Portuguese Zone. b) Geological map of the  
686 Pulo do Lobo [belt domain](#) and other units related to the OMZ/SPZ boundary with indications of the  
687 two cross-sections studied: [and collected samples](#). c.1-2) Geological cross-sections of the Pulo do  
688 Lobo [belt domain](#) (see b for location) (modified from Martínez Poza et al., 2012 and Pérez-Cáceres  
689 et al., 2015). Numbered red circles in b-c locate the samples studied. Big circles show the KI values  
690 for 10 Å reflection peaks of K-white mica and the average RSCM temperatures, with the relative  
691 colour bar according to the results shown in Table 1. BAA: Beja-Acebuches Amphibolites, M:  
692 metabasalts, PL: Pulo do Lobo formation, RL: Ribeira de Limas formation, SI: Santa Iria formation.

693 **Figure 2.** Pictures of the Pulo do Lobo rocks illustrating deformation at outcrop scale: a) Pulo do  
694 Lobo formation, b) Ribeira de Limas formation, c) Santa Iria formation. Microphotographs from  
695 thin-sections: d) Cross-polarized light image of sample PLB-84 (Pulo do Lobo formation), e) SEM-  
696 BSE image of sample PLB-88 (Ribeira de Limas formation), f) Cross-polarized light images of sample  
697 PLB-71 (Santa Iria formation).

698 **Figure 3.** Representative Raman spectra of CM across the Pulo do Lobo [belt domain](#) from low  
699 temperature (bottom; Santa Iria formation) to high temperature (top; lower formations) including the

700 average maximum temperatures (°C) for each sample. Vertical scale for spectrum intensity is arbitrary.  
701 See Fig. 1 for sample location and Table 1 and supplementary information for RSCM data.

702 **Figure 4.** X-Ray maps of the three selected samples analyzed by EPMA and processed with  
703 XMapTools. The samples belong to the lower formations of the Pulo do Lobo ~~belt~~domain (sample  
704 PLB-88: Ribeira de Limas formation; samples PLB-84 and PLB-93: Pulo do Lobo formation; the  
705 latter (PLB-93) is close to Early Carboniferous igneous intrusions). a) EPMA BSE photographs. b)  
706 Mineral maps. c) Al<sup>IV</sup> content map in chlorites, which increases with temperature. The white square  
707 highlights the zonation of a chlorite grain from core to rim. d) Temperature maps of chlorite using  
708 the Lanari et al. (2014a) geothermometer assuming all iron as ferrous. White squares show selected  
709 areas illustrating higher-temperature chlorite cores. Red squares show the selected areas  
710 (representative of S<sub>1</sub> foliation) used for chlorite-quartz-water geothermometric calculations shown in  
711 Fig. 7.

712 **Figure 5.** Ternary plots of all the analyzed white micas (a) (Cel: celadonite, Mus: muscovite, Prl:  
713 pyrophyllite) and chlorite (b) (Cli+Daph: clinocllore + daphnite, Am: amesite, Sud: sudoite) plotted  
714 with the XmapTools TriPlot3D module. Colour bars refer to the number of mica/chlorite pixels  
715 analyzed.

716 **Figure 6.** Compositional diagram of white micas showing Na/(Na+K) vs Si/Al (atomic ratios) for 31  
717 EPMA point analyses from seven samples of the lower formations of the Pulo do Lobo ~~belt~~domain  
718 (different symbology, for each sample). Point analyses were obtained on the microprobe at the  
719 University of Huelva (Spain). Qualitative information about temperature and pressure conditions are  
720 respectively according to Guidotti et al. (1994), Coggon and Holland (2002), Parra et al. (2002),  
721 Massonne and Schreyer (1987) and Massonne and Szpurka (1997).

722 **Figure 7.** Histograms of temperatures obtained using the chlorite-quartz-water geothermometer of  
723 Vidal et al. (2006) (a) and Bourdelle et al. (2013) (b) on selected representative S<sub>1</sub> chlorites (see red  
724 squares in Fig. 4d for location). *n* represents the number of chlorites that could be used for each  
725 calibration. The number of analyses is lower in those with Vidal et al. (2006) approach because the  
726 assumption that the Si content of chlorite is lower than 3 apfu.

727

728

## 729 Table captions

730 **Table 1.** Samples and results obtained by XRD (<2 μm fraction), white mica and chlorite  
731 compositions, temperature ranges from chlorite thermometry, and average RSCM thermometry.  
732 ~~Basel~~ KI values and average RSCM temperatures show a relative colour-bar scale. Mineral  
733 abbreviations according to Whitney & Evans (2010). Qz: Quartz, Ms: Muscovite, Fsp:  
734 ~~Feldspar~~Feldspar, Chl: Chlorite, Pg: paragonite, C/S: chlorite-smectite mixed layers, Cel: celadonite,  
735 Prl: pyrophyllite, Cli+Daph: clinocllore + daphnite, Am: amesite, Sud: sudoite, Std Dv: standard  
736 deviation.

737 **Table 2.** Summary of the tectonometamorphic Variscan evolution of the Pulo do Lobo  
738 ~~belt~~domain.

739

740

## 741 References

- 742 Abad, I., Mata, M.P., Nieto, F., and Velilla, N.: The phyllosilicates in diagenetic-metamorphic rocks  
743 of the South Portuguese Zone, southwestern Portugal, *The Canadian Mineralogist*, 39(6),  
744 1571-1589, 2001.
- 745 Abad, I., Nieto, F., and Velilla, N.: Chemical and textural characterisation of diagenetic to low-grade  
746 metamorphic phyllosilicates in turbidite sandstones of the South Portuguese Zone: A  
747 comparison between metapelites and sandstones, *Schweizerische Mineralogische und*  
748 *Petrographische Mitteilungen*, 82(2), 303-324. 2002.
- 749 Abad, I., Nieto, F., and Gutiérrez-Alonso, G.: Textural and chemical changes in slate-forming  
750 phyllosilicates across the external-internal zones transition in the low-grade metamorphic  
751 belt of the NW Iberian Variscan Chain, *Swiss Bulletin of Mineralogy and Petrology*, 83(1),  
752 63-80, 2003a.
- 753 Abad, I., Gutierrez-Alonso, G., Nieto, F., Gertner, I., Becker, A., and Cabero, A.: The structure and  
754 the phyllosilicates (chemistry, crystallinity and texture) of Talas Ala-Tau (Tien Shan, Kyrgyz  
755 Republic); comparison with more recent subduction complexes, *Tectonophysics*, 365(1-4),  
756 103-127, 2003b.
- 757 Abad, I., Nieto, F., Gutiérrez-Alonso, G., Campo, M. D., López-Munguira, A., and Velilla, N.: Illitic  
758 substitution in micas of very low-grade metamorphic clastic rocks. *European Journal of*  
759 *Mineralogy*, 18(1), 59-69, 2006.
- 760 Abad, I., Nieto, F., Velilla, N., and Suárez-Ruiz, I.: Metamorphic evidences from the Monchique  
761 pluton (South Portugal): Contact metamorphism vs regional metamorphism under very low-  
762 grade conditions, *Revista de la Sociedad Geológica de España*, 27(1): 337-350, 2014.
- 763 Abalos, B., Gil Iburguchi, J.I., and Eguiluz, L.: Cadomian subduction/collision and Variscan  
764 transpression in the Badajoz-Córdoba shear belt, southwest Spain, *Tectonophysics*, 199, 51-  
765 72, 1991.
- 766 Airaghi, L., Lanari, P., de Sigoyer, J., and Guillot, S.: Microstructural vs compositional preservation  
767 and pseudomorphic replacement of muscovite in deformed metapelites from the Longmen  
768 Shan (Sichuan, China), *Lithos*, 282, 262-280, 2017.
- 769 Ali, A.: The tectono-metamorphic evolution of the Balcooma Metamorphic Group, north-eastern  
770 Australia: a multidisciplinary approach, *Journal of Metamorphic Geology*, 28(4), 397-422,  
771 2010.
- 772 Apalategui, O., Barranco, E., Contreras, F., Delgado, M., and Roldán, F. J.: Hoja 916, Aroche, Mapa  
773 Geológico de España a escala 1:50000, Inst. Geológico y Minero de España, Madrid, 1983.
- 774 Araújo, A., Fonseca, P., Munhá, J., Moita, P., Pedro, J., and Ribeiro, A.: The Moura Phyllonitic  
775 Complex: an accretionary complex related with obduction in the southern Iberia Variscan  
776 suture, *Geodinamica Acta*, 18, 375-388, 2005.
- 777 Arenas, R., Abati, J., Martínez Catalán, J.R., García, F. D., and Pascual, F.R.: PT evolution of eclogites  
778 from the Agualada Unit (Ordenes Complex, northwest Iberian Massif, Spain): Implications  
779 for crustal subduction, *Lithos*, 40(2), 221-242, 1997.
- 780 Azor, A., González Lodeiro, F., and Simancas, J.F.: Tectonic evolution of the boundary between the  
781 Central Iberian and Ossa-Morena zones (Variscan Belt, southwest Spain), *Tectonics*, 13, 45-  
782 61, 1994.
- 783 Azor, A., Rubatto, D., Simancas, J.F., González Lodeiro, F., Martínez Poyatos, D., Martín Parra L.M.,  
784 and Matas, J.: Rheic Ocean ophiolitic remnants in Southern Iberia questioned by SHRIMP  
785 U-Pb zircon ages on the Beja-Acebuches amphibolites, *Tectonics*, 27(5), 2008.

Con formato: Inglés (Estados Unidos)

Con formato: Inglés (Reino Unido)

Con formato: Inglés (Reino Unido)

- 786 Azor, A., Simancas, J.F., Martínez Poyatos, D., Pérez-Cáceres, I., González Lodeiro, F., and Expósito,  
787 I.: Chapter 10.3: Deformation and Structure, Southwestern Iberia, in: *The Geology of Iberia:*  
788 *A Geodynamic Approach, Volume 2: The Variscan Cycle*, edited by: Quesada, C., and  
789 Oliveira, J.T., Springer, 316-335, 2019.
- 790 Barbero, L.: Granulite-facies metamorphism in the Anatectic Complex of Toledo, Spain: late  
791 Hercynian tectonic evolution by crustal extension, *Journal of the Geological Society*, 152(2),  
792 365-382, 1995.
- 793 Bard, J.P. : Signification tectonique des métatholeites d'anité abyssale de la ceinture de base pression  
794 d'Aracena (Huelva, Espagne), *Bulletin de la Société Géologique de France*, 19, 385-393,  
795 1977.
- 796 Bastida, F., Martínez-Catalán, J.R., and Pulgar, J.A.: Structural, metamorphic and magmatic history  
797 of the Mondoñedo nappe (Hercynian belt, NW Spain). *Journal of Structural Geology*, 8(3-  
798 4), 415-430, 1986.
- 799 Bastida, F., Brime, C., García-López, S. Aller, J., Valin, M.L., and Sanz-López, J.: Tectono-thermal  
800 evolution of the Cantabrian Zone (NW Spain), in: *Palaeozoic conodonts from northern*  
801 *Spain*, edited by: García López, S., and Bastida, F., Instituto Geológico y Minero de España,  
802 *Cuadernos del Museo Geominero*, 1, 105-123, Madrid, ISBN: 84-7840-446-5, 2002.
- 803 Battaglia, S., Leoni, L., and Sartori, F.: The Kübler index in late diagenetic to low-grade metamorphic  
804 pelites: a critical comparison of data from 10 Å and 5 Å peaks, *Clays and Clay Minerals*,  
805 52(1), 85-105, 2004.
- 806 Beyssac, O., Goffé, B., Chopin, C., and Rouzaud, J.N.: Raman spectra of carbonaceous material in  
807 metasediments: a new geothermometer, *Journal of Metamorphic Geology*, 20, 859-871,  
808 2002a.
- 809 Beyssac, O., Rouzaud, J.-N., Goffé, B., Brunet, F., and Chopin, C.: Graphitization in a high-pressure,  
810 low temperature metamorphic gradient: a Raman microspectroscopy and HRTEM study.  
811 *Contrib. Mineral. Petrol.*, 143, 19-31, 2002b.
- 812 Beyssac, O., Goffé, B., Petitot, J.P., Froigneux, E., and Rouzaud, J.N.: On the characterization of  
813 disordered and heterogeneous carbonaceous materials using Raman spectroscopy,  
814 *Spectrochim. Acta A Mol. Biomol. Spectrosc.*, 59, 2267-2276, 2003.
- 815 Beyssac, O., Bollinger, L., Avouac, J.P., and Goffé, B.: Thermal metamorphism in the lesser Himalaya  
816 of Nepal determined from Raman spectroscopy of carbonaceous material, *Earth and*  
817 *Planetary Science Letters*, 225, 233-241, 2004.
- 818 Booth-Rea, G., Simancas, J.F., Azor, A., Azañón, J.M., Gonzalez Lodeiro, F., and Fonseca, P.: HP-  
819 LT Variscan metamorphism in the Cubito-Moura schists (Ossa-Morena Zone, southern  
820 Iberia), *Comptes Rendus Geoscience*, 338(16), 1260-1267, 2006.
- 821 Bourdelle, F., Parra, T., Chopin, C., and Beyssac, O.: A new chlorite geothermometer for diagenetic  
822 to low-grade metamorphic conditions, *Contributions to Mineralogy and Petrology*, 165(4),  
823 723-735, 2013.
- 824 Bousquet, R., Oberha, R., Goffé, B., Wiederkehr, M., Koller, F., Schmid, S.M., Schuster, R., Engi,  
825 M., Berger, A., and Martinotti, G.: Metamorphism of metasediments at the scale of an  
826 orogen: a key to the tertiary geodynamic evolution of the Alps, *Geological Society, London,*  
827 *Special Publications*, 298, 393-411, 2008.

- 828 Braid, J.A., Murphy, J.B., and Quesada, C.: Structural analysis of an accretionary prism in a continental  
829 collisional setting, the Late Paleozoic Pulo do Lobo Zone, Southern Iberia, *Gondwana*  
830 *Research*, 17(2-3), 422-439, 2010.
- 831 Braid, J. A., Murphy, J. B., Quesada, C., and Mortensen, J.: Tectonic escape of a crustal fragment  
832 during the closure of the Rheic Ocean: U–Pb detrital zircon data from the Late Palaeozoic  
833 Pulo do Lobo and South Portuguese zones, southern Iberia, *Journal of the Geological*  
834 *Society*, 168(2), 383-392, 2011.
- 835 [Braid, J. A., Murphy, J. B., Quesada, C., Gladney, E. R. and Dupuis, N.: Progressive magmatism and](#)  
836 [evolution of the Variscan suture in southern Iberia. \*International Journal of Earth Sciences\*,](#)  
837 [107\(3\), 971-983, 2018.](#)
- 838 Brown, M.: P–T–t evolution of orogenic belts and the causes of regional metamorphism, *Journal of*  
839 *the Geological Society*, 150(2), 227-241, 1993.
- 840 Burg, J.P., Iglesias, M., Laurent, P., Matte, P., and Ribeiro, A.: Variscan intracontinental deformation:  
841 the Coimbra–Córdoba Shear zone (SW Iberian Peninsula), *Tectonophysics*, 78, 161-177,  
842 1981.
- 843 Cantarero, I., Lanari, P., Vidal, O., Alías, G., Travé, A., and Baqués, V.: Long-term fluid circulation  
844 in extensional faults in the central Catalan Coastal Ranges: P–T constraints from neoformed  
845 chlorite and K-white mica, *International Journal of Earth Sciences*, 103(1), 165-188, 2014.
- 846 Castro, A., Fernández, C., De la Rosa, J.D., Moreno Ventas, I., and Rogers, G.: Significance of  
847 MORB-derived amphibolites from the Aracena metamorphic belt, southwest Spain, *Journal*  
848 *of Petrology*, 37(2), 235-260, 1996.
- 849 Castro, A., Fernández, C., El-Hmidi, H., El-Biad, M., Díaz, M., De la Rosa, J., and Stuart, F.: Age  
850 constraints to the relationships between magmatism, metamorphism and tectonism in the  
851 Aracena metamorphic belt, southern Spain, *International Journal of Earth Sciences*, 88(1),  
852 26-37, 1999.
- 853 Cathelineau, M.: Cation site occupancy in chlorites and illites as a function of temperature, *Clay*  
854 *Minerals* 23, 471-485, 1988.
- 855 Cathelineau, M., and Nieva, D.: A chlorite solid solution geothermometer the Los Azufres (Mexico)  
856 geothermal system, *Contrib. Mineral Petrol.*, 91(3), 235-244, 1985.
- 857 Coggon, R., and Holland, T.J.B.: Mixing properties of phengitic micas and revised garnet-phengite  
858 thermobarometers, *Journal of Metamorphic Geology*, 20(7), 683-696, 2002.
- 859 [Crespo-Blanc, A., and Orozco, M.: The Southern Iberian Shear Zone: a major boundary in the](#)  
860 [Hercynian folded belt. \*Tectonophysics\*, 148\(3-4\), 221-227, 1988.](#)
- 861 [Crespo-Blanc, A.:](#) Evolución geotectónica del contacto entre la zona de Ossa-Morena y la zona  
862 Surportuguesa en las sierras de Aracena y Aroche (Macizo Ibérico Meridional): Un contacto  
863 mayor en la cadena Hercínica Europea, Ph.D. Thesis, Univ. de Granada, 327 pp., 1991.
- 864 Crouzet, C., Dunkl, I., Paudel, L., Arkai, P., Rainer, T.M., Balogh, K., and Appel, E.: Temperature  
865 and age constraints on the metamorphism of the Tethyan Himalaya in Central Nepal: A  
866 multidisciplinary approach, *Journal of Asian Earth Sciences*, 30(1), 113-130, 2007.
- 867 Dahn, D.R.L., Braid, J.A., Murphy, J.B., Quesada, C., Dupuis, N., and McFarlane C.R.M.:  
868 Geochemistry of the Peramora Melange and Pulo do Lobo schist: Geochemical investigation  
869 and tectonic interpretation of mafic melange in the Pangean suture zone, Southern Iberia,  
870 *International Journal of Earth Sciences*, 103(5), 1415-1431, 2014.

Con formato: Inglés (Reino Unido)

Con formato: Inglés (Estados Unidos)

Con formato: Inglés (Reino Unido)

- 871 Dallmeyer, R.D., Fonseca, P.E., Quesada, C., and Ribeiro, A.:  $^{40}\text{Ar}/^{39}\text{Ar}$  mineral age constraints for  
872 the tectonothermal evolution of a variscan suture in Southwest Iberia, *Tectonophysics*, 222,  
873 177-194, 1993.
- 874 De Andrade, V., Vidal, O., Lewin, E., O'Brien, P., and Agard, P.: Quantification of electron  
875 microprobe compositional maps of rock thin sections: an optimized method and examples,  
876 *Journal of Metamorphic Geology*, 24(7), 655-668, 2006.
- 877 Díaz Azpiroz, M., Fernández, C., Castro, A., and El-Biad, M.: Tectonometamorphic evolution of the  
878 Aracena metamorphic belt (SW Spain) resulting from ridge-trench interaction during  
879 Variscan plate convergence, *Tectonics*, 25(1), 2006.
- 880 Eden, C.P.: Tectonostratigraphic analysis of the northern extent of the oceanic exotic terrane,  
881 Northwestern Huelva Province, Spain, Ph. D. Thesis, Univ. of Southampton, 214 pp., 1991.
- 882 Eden, C., and Andrews, J.: Middle to upper Devonian melanges in SW Spain and their relationship  
883 to the Meneage formation in south Cornwall. *Proc. Ussher Soc.*, 7, 217-222, 1990.
- 884 Endo, S., and Wallis, S.R.: Structural architecture and low-grade metamorphism of the Mikabu-  
885 Northern Chichibu accretionary wedge, SW Japan, *Journal of Metamorphic Geology*, 35(6),  
886 695-716, 2017.
- 887 Ernst, W.G.: Tectonic history of subduction zones inferred from retrograde blueschist PT paths,  
888 *Geology* 16(12), 1081-1084, 1988.
- 889 Ernst, W.G.: Alpine and Pacific styles of Phanerozoic mountain building: subduction-zone  
890 petrogenesis of continental crust, *Terra Nova*, 17(2), 165-188, 2005.
- 891 Escuder Viruete, J., Arenas, R., and Martínez Catalán, J.R.: Tectonothermal evolution associated with  
892 Variscan crustal extension in the Tormes gneiss dome (NW Salamanca, Iberian Massif,  
893 Spain), *Tectonophysics*, 238(1-4), 117-138, 1994.
- 894 Fonseca, P., and Ribeiro, A.: Tectonics of the Beja-Acebuches ophiolite - a major suture in the Iberian  
895 variscan foldbelt, *Geol. Rundsch.*, 82, 440-447, 1993.
- 896 Fonseca, P., Munhá, J., Pedro, J., Rosas, F., Moita, P., Araujo, A., and Leal, N.: Variscan ophiolites  
897 and high-pressure metamorphism in southern Iberia. *Ofioliti*, 24, 259-268, 1999.
- 898 Franceschelli, M., Leoni, L., Memmi, I., and Puxeddu, M.: Regional distribution of Al-silicates and  
899 metamorphic zonation in the low-grade Verrucano metasediments from the Northern  
900 Apennines, Italy, *Journal of Metamorphic Geology*, 4(3), 309-321, 1986.
- 901 Frey, M.: Very low-grade metamorphism of clastic sedimentary rocks, in: *Low temperature*  
902 *metamorphism*, edited by: Frey, M., Blackie, Glasgow, 9-58, 1987.
- 903 Frey, M., and Robinson, D.: *Low-Grade Metamorphism*, 313 pp. Blackwell Science Ltd, Cambridge,  
904 1999.
- 905 Gil Ibarra, J., Mendia, M., Girardeau, J., and Peucat, J.J.: Petrology of eclogites and clinopyroxene-  
906 garnet metabasites from the Cabo Ortegal Complex (northwestern Spain), *Lithos*, 25(1-3),  
907 133-162, 1990.
- 908 Goffé, B., and Velde, B.: Contrasted metamorphic evolutions in thrust cover units of the  
909 Briançonnais zone (French Alps): A model for the conservation of HP-LT metamorphic  
910 mineral assemblages, *Earth and Planetary Science Letters*, 68(2), 351-360, 1984.



- 911 Grosch, E.G., Vidal, O., Abu-Alam, T., and McLoughlin, N.: P–T constraints on the metamorphic  
 912 evolution of the Paleoproterozoic Kromberg type-section, Barberton greenstone belt, South  
 913 Africa, *Journal of Petrology*, 53(3), 513-545, 2012.
- 914 Grosch, E.G., McLoughlin, N., Lanari, P., Erambert, M., and Vidal, O.: Microscale mapping of  
 915 alteration conditions and potential biosignatures in basaltic-ultramafic rocks on early Earth  
 916 and beyond, *Astrobiology*, 14(3), 216-228, 2014.
- 917 Guidotti, C.V., and Sassi, F.P.: Classification and correlation of metamorphic facies series by means  
 918 of muscovite b data from low-grade metapelites, *Neues Jahrbuch für Mineralogie-  
 919 Abhandlungen*, 153, 363-380, 1986.
- 920 Guidotti, C. V., Mazzoli, C., Sassi, F. P., and Blencoe, J. G.: Compositional controls on the cell  
 921 dimensions of 2M1 muscovite and paragonite, *European Journal of Mineralogy*, 4(2), 283-  
 922 297, 1992.
- 923 Guidotti, C.V., Sassi, F.P., Blencoe, J.G., and Selverstone, J.: The paragonite–muscovite solvus: I. P-  
 924 T-X limits derived from the Na – K compositions of natural, quasibinary paragonite-  
 925 muscovite pairs, *Geoch. Cosmochim. Acta*, 58, 2269–2275, 1994.
- 926 Gutiérrez-Alonso, G., and Nieto, F.: White-mica 'crystallinity', finite strain and cleavage development  
 927 across a large Variscan structure, NW Spain, *Journal of the Geological Society*, 153(2), 287-  
 928 299, 1996.
- 929 Hilchie, L.J., and Jamieson, R.A.: Graphite thermometry in a low-pressure contact aureole, Halifax,  
 930 Nova Scotia, *Lithos*, 208, 21-33, 2014.
- 931 Jarosewich, E.J., Nelen, J.A., and Norberg, J.A.: Reference samples for electron microprobe analysis:  
 932 *Geostandards Newsletter*, 4, 43-47, 1980.
- 933 Kisch, H.J.: Correlation between indicators of very low-grade metamorphism. In: *Low temperature  
 934 metamorphism*, edited by: Frey, M., Blackie, Glasgow, 227-300, 1987.
- 935 Kisch, H.J.: Illite crystallinity: recommendations on sample preparation, X-ray diffraction settings,  
 936 and interlaboratory samples, *Journal of Metamorphic Geology*, 9, 665–670, 1991.
- 937 Kübler, B. : Evaluation quantitative du metamorphism par la cristallinite de l'illite. *Bull. Centres Rech.  
 938 Pau-SNPA* 2, 385-397, 1968.
- 939 Lahfid, A., Beyssac, O., Deville, E., Negro, F., Chopin, C., and Goffé, B.: Evolution of the Raman  
 940 spectrum of carbonaceous material in low-grade metasediments of the Glarus Alps  
 941 (Switzerland), *Terra Nova*, 22, 354-360, 2010.
- 942 Lanari, P., Guillot, S., Schwartz, S., Vidal, O., Tricart, P., Riel, N., and Beyssac, O. : Diachronous  
 943 evolution of the alpine continental subduction wedge: evidence from P-T estimates in the  
 944 Briançonnais Zone houillère (France-Western Alps), *Journal of Geodynamics*, 56-57, 39-54,  
 945 2012.
- 946 Lanari, P., Vidal, O., de Andrade, V., Dubacq, B., Lewin, E., Grosch, E.G., and Schwartz, S.:  
 947 XMapTools: A MATLAB©-based program for electron microprobe X-Ray image  
 948 processing and geothermobarometry, *Computers & Geosciences*, 62, 227-240, 2014a.
- 949 Lanari, P., Rolland, Y., Schwartz, S., Vidal, O., Guillot, S., Tricart, P., and Dumont, T.: P–T–t  
 950 estimation of deformation in low-grade quartz-feldspar-bearing rocks using thermodynamic  
 951 modelling and <sup>40</sup>Ar/<sup>39</sup>Ar dating techniques: example of the Plan-de-Phasy shear zone unit  
 952 (Briançonnais Zone, Western Alps), *Terra Nova*, 26(2), 130-138, 2014b.

- 953 Lopes, G., Pereira, Z., Fernandes, P., Wicander, R., Matos, J.X., Rosa, D., and Oliveira, J.T.: The  
 954 significance of reworked palynomorphs (middle Cambrian to Tournaisian) in the Viséan  
 955 Toca da Moura Complex (South Portugal). Implications for the geodynamic evolution of  
 956 Ossa Morena Zone, *Rev. Palaeobot. Palynol.*, 200, 1-23, 2014.
- 957 López-Carmona, A., Pitra, P., and Abati, J.: Blueschist-facies metapelites from the Malpica-Tui Unit  
 958 (NW Iberian Massif): phase equilibria modelling and H<sub>2</sub>O and Fe<sub>2</sub>O<sub>3</sub> influence in high-  
 959 pressure assemblages, *Journal of Metamorphic Geology*, 31(3), 263-280, 2013.
- 960 López Munguira, A., Nieto, F., Pardo, E. S., and Velilla, N.: The composition of phyllosilicates in  
 961 Precambrian, low-grade metamorphic, clastic rocks from the Southern Hesperian Massif  
 962 (Spain) used as an indicator to metamorphic conditions, *Precambrian Research*, 53(3-4), 267-  
 963 279, 1991.
- 964 López Sánchez-Vizcaíno, V., Gómez Pugnare, M.T., Azor, A., and Fernández Soler, J.M.: Phase  
 965 diagram sections applied to amphibolites: a case study from the Ossa-Morena/Central  
 966 Iberian Variscan suture (Southwestern Iberian Massif), *Lithos*, 68, 1-21, 2003.
- 967 Martínez Catalán, J.R.: Estratigrafía y estructura del Domo de Lugo (Sector Oeste de la Zona  
 968 Asturoccidental-leonesa), *Corpus Geol. Gallaeacae (2º Serie)*, 2, 1-291, 1985.
- 969 Martínez Catalán, J.R., Rubio Pascual, F.J., Díez Montes, A., Díez Fernández, R., Gómez Barreiro,  
 970 J., Dias Da Silva, Í., González Clavijo, E., Ayarza, P., and Alcock, J.E.: The late Variscan  
 971 HT/LP metamorphic event in NW and Central Iberia: relationships to crustal thickening,  
 972 extension, orocline development and crustal evolution, Geological Society, London, Special  
 973 Publications, 405(1), 225-247, 2014.
- 974 Martínez Poyatos, D., Nieto, F., Azor, A., and Simancas, J.F.: Relationships between very low-grade  
 975 metamorphism and tectonic deformation: Examples from the southern Central Iberian Zone  
 976 (Iberian Massif, Variscan Belt), *Journal of the Geological Society*, 158, 953-968, 2001.
- 977 Martínez Poza, A.I., Martínez Poyatos, D., Simancas, J.F., and Azor, A.: La estructura varisca de la  
 978 Unidad del Pulo do Lobo (SO del Macizo Ibérico) en las transversales de Aroche y Rosal de  
 979 la Frontera (Huelva), *Geogaceta*, 52, 21-24, 2012.
- 980 Massonne, H.J., and Schreyer, W.: Phengite geobarometry based on the limiting assemblage with K-  
 981 feldspar, phlogopite, and quartz, *Contributions to Mineralogy and Petrology*, 96, 212-224,  
 982 1987.
- 983 Massonne, H.J., and Szpurka, Z.: Thermodynamic properties of white micas on the basis of high-  
 984 pressure experiments in the systems K<sub>2</sub>O-MgO-Al<sub>2</sub>O<sub>3</sub>- SiO<sub>2</sub>-H<sub>2</sub>O and K<sub>2</sub>O-FeO-Al<sub>2</sub>O<sub>3</sub>-  
 985 SiO<sub>2</sub>-H<sub>2</sub>O. *Lithos*, 41, 229-250, 1997.
- 986 Matte, P.: The Variscan collage and orogeny (480-290 Ma) and the tectonic definition of the Armorica  
 987 microplate: A review, *Terra Nova*, 13, 122-128, 2001.
- 988 Merriman, R.J., and Frey, M.: Patterns of very low-grade metamorphism in metapelitic rocks, in: *Low-  
 989 grade metamorphism*, edited by: Frey, M., and Robinson, D., Blackwell, Oxford, 61-107,  
 990 1999.
- 991 Moita, P., Munhá, J., Fonseca, P., Pedro, J., Araújo, A., Tassinari, C., and Palacios, T.: Phase equilibria  
 992 and geochronology of Ossa-Morena eclogites, *Actas do XIV Semana de Gequímica / VIII  
 993 Congresso de geoquímica dos Países de Língua Portuguesa*, 2, 471-474, 2005.
- 994 Moore, D.M., and Reynolds, R.C. Jr.: *X-ray Diffraction and the Identification and Analysis of Clay  
 995 Minerals*, 2nd edition, Oxford University Press, Oxford, 1997.

- 996 Mori, H., Mori, N., Wallis, S., Westaway, R., and Annen, C.: The importance of heating duration for  
 997 Raman CM thermometry: evidence from contact metamorphism around the Great Whin Sill  
 998 intrusion, UK, *Journal of Metamorphic Geology*, 35(2), 165-180, 2017.
- 999 Munhá, J.: Metamorphic evolution of the south Portuguese/Pulo do Lobo zone, in: *Pre-Mesozoic*  
 1000 *Geology of Iberia*, edited by: Dallmeyer, R.D., and Martínez García, E., Springer, Berlin,  
 1001 Germany, pp. 363-368, 1990.
- 1002 [Murphy, J. B., Quesada, C., Gutiérrez-Alonso, G., Johnston, S. T. and Weil, A.: Reconciling](#)  
 1003 [competing models for the tectono-stratigraphic zonation of the Variscan orogen in Western](#)  
 1004 [Europe. \*Tectonophysics\*, 681, 209-219, 2016.](#)
- 1005 Nieto, F., and Sánchez-Navas, A.: A comparative XRD and TEM study of the physical meaning of  
 1006 the white mica «crystallinity» index, *European Journal of Mineralogy*, 6(5), 611-621, 1994.
- 1007 Nieto, F., Mata, M.P., Bauluz, B., Giorgetti, G., Árkai, P., and Peacor, D.R.: Retrograde diagenesis, a  
 1008 widespread process on a regional scale, *Clay Minerals*, 40(1), 93-104, 2005.
- 1009 Oliveira, J.T.: Part VI: South Portuguese Zone, stratigraphy and synsedimentary tectonism, in: *Pre-*  
 1010 *Mesozoic Geology of Iberia*, edited by: Dallmeyer, R.D., and Martínez García, E., Springer,  
 1011 Berlin, Germany, pp. 334-347, 1990
- 1012 Olsson, I.: Regional burial heating vs. local magmatic heat influence of the Röstänga area, Scania,  
 1013 southern Sweden, *GFF*, 121(3), 209-214, 1999.
- 1014 Omrani, H., Moazzen, M., Oberhänsli, R., and Moslempour, M.E.: Iranshahr blueschist: subduction  
 1015 of the inner Makran oceanic crust, *Journal of Metamorphic Geology*, 35(4), 373-392, 2017.
- 1016 Ordóñez-Casado, B.: Geochronological studies of the Pre-Mesozoic basement of the Iberian Massif:  
 1017 the Ossa-Morena Zone and the Allochthonous Complexes within the Central Iberian Zone,  
 1018 Ph.D. Thesis, ETH Zurich, 235 pp., 1998.
- 1019 Parra, T., Vidal, O., and Agard, P., A thermodynamic model for Fe-Mg dioctahedral K White micas  
 1020 using data from phase-equilibrium experiments and natural pelitic assemblages, *Contrib.*  
 1021 *Mineral Petrol.*, 143, 706-732, 2002.
- 1022 Pedro, J., Araujo, A., Fonseca, P., Tassinari, C., and Ribeiro, A.: Geochemistry and U-Pb Zircon Age  
 1023 of the Internal Ossa-Morena Zone Ophiolite Sequences: A Remnant of Rheic Ocean in SW  
 1024 Iberia, *Oñoliti*, 35(2), 117-130, 2010.
- 1025 Pereira, M.F., Apraiz, A., Chichorro, M., Silva, J.B., and Armstrong, R.A.: Exhumation of high  
 1026 pressure rocks in northern Gondwana during the Early Carboniferous (Coimbra-Cordoba  
 1027 shear zone, SW Iberian Massif): tectonothermal analysis and U-Th-Pb SHRIMP in-situ  
 1028 zircon geochronology, *Gondwana Research*, 17, 440-460, 2010.
- 1029 Pereira, M.F., Chichorro, M., Silva, J.B., Ordóñez-Casado, B., Lee, J.K., and Williams, I.S.: Early  
 1030 carboniferous wrenching, exhumation of high-grade metamorphic rocks and basin instability  
 1031 in SW Iberia: constraints derived from structural geology and U-Pb and <sup>40</sup>Ar-<sup>39</sup>Ar  
 1032 geochronology, *Tectonophysics*, 558, 28-44, 2012.
- 1033 Pereira, M.F., Chichorro, M., Williams, I.S., Silva, J.B., Fernández, C., Díaz-Azpiroz, M., Apraiz, A.,  
 1034 and Castro, A.: Variscan intra-orogenic extensional tectonics in the Ossa-Morena Zone  
 1035 (Évora-Aracena-Lora del Río metamorphic belt, SW Iberian Massif): SHRIMP zircon U-Th-  
 1036 Pb geochronology, *Geological Society, London, Special Publications*, 327(1), 215-237, 2009.
- 1037 Pereira, M.F., Martínez Poyatos, D., Pérez-Cáceres, I., Gama, C., and Azor, A.: Comment on  
 1038 “Stratigraphy of the Northern Pulo do Lobo Domain, SW Iberia Variscides: A palynological  
 1039 contribution” by Pereira, Z. et al. (2018) - *Geobios*, 51, 491-506. *Geobios*, in press, 2019.

- 1040 Pereira, Z., Matos, J., Fernandes, P., and Oliveira, J.T.: Palynostratigraphy and systematic palynology  
 1041 of the Devonian and Carboniferous successions of the South Portuguese Zone, Portugal,  
 1042 Memórias Geológicas do Instituto Nacional de Engenharia, Tecnologia e Inovação 34,  
 1043 Lisboa, 2008.
- 1044 Pereira, Z., Fernandes, P., Matos, J., Jorge, R., and Oliveira, J.T.: Stratigraphy of the Northern Pulo  
 1045 do Lobo Domain, SW Iberia Variscides: A palynological contribution, *Geobios*, 51, 491-506,  
 1046 2018.
- 1047 Pérez-Cáceres, I., Martínez Poyatos, D., Simancas, J.F., and Azor, A.: The elusive nature of the Rheic  
 1048 Ocean in SW Iberia, *Tectonics*, 34, 2429-2450, 2015.
- 1049 Pérez-Cáceres, I., Simancas, J.F., Martínez Poyatos, D., and Azor, A.: Oblique collision and  
 1050 deformation partitioning in the SW Iberian Variscides, *Solid Earth*, 7, 857-872, 2016.
- 1051 Pérez-Cáceres, I., Martínez Poyatos, D., Simancas, J.F., and Azor, A.: Testing the Avalonian affinity  
 1052 of the South Portuguese Zone and the Neoproterozoic evolution of SW Iberia through  
 1053 detrital zircon populations, *Gondwana Research*, 42, 177-192, 2017.
- 1054 Pérez-Estaún, A., Bea, F. and Vera, J. A.: Macizo Ibérico. Edited by: Vera, J.A., *Geología de España*,  
 1055 19-228, 2004.
- 1056 Petschick R.: [http://www.geol-pal.uni-frankfurt.de/  
 1057 Staff/Homepages/Petschick/classicsoftware.html# MacDiff](http://www.geol-pal.uni-frankfurt.de/Staff/Homepages/Petschick/classicsoftware.html#MacDiff), 2004.
- 1058 Platt, J. P.: Dynamics of orogenic wedges and the uplift of high-pressure metamorphic rocks,  
 1059 *Geological Society of America Bulletin*, 97(9), 1037-1053, 1986.
- 1060 Ponce, C., Simancas, J.F., Azor, A., Martínez Poyatos, D.J., Booth-Rea, G., and Expósito, I.:  
 1061 Metamorphism and kinematics of the early deformation in the Variscan suture of SW Iberia,  
 1062 *Journal of Metamorphic Geology*, 30(7), 625-638, 2012.
- 1063 Potel, S., Ferreiro-Mählmann, R., Stern, W. B., Mullis, J., and Frey, M.: Very low-grade metamorphic  
 1064 evolution of pelitic rocks under high-pressure/low-temperature conditions, NW New  
 1065 Caledonia (SW Pacific), *Journal of Petrology*, 47(5), 991-1015, 2006
- 1066 Potel, S., Maison, T., Maillet, M., Sarr, A. C., Doublier, M. P., Trullenque, G., and Mählmann, R. F.:  
 1067 Reliability of very low-grade metamorphic methods to decipher basin evolution: Case study  
 1068 from the Markstein basin (Southern Vosges, NE France), *Applied Clay Science*, 134, 175-  
 1069 185, 2016.
- 1070 Quesada, C.: *Precambrian successions in SW Iberia: their relationship to 'Cadomian' orogenic events.*  
 1071 *Geological Society, London, Special Publications, 51(1), 353-362, 1990.* Quesada, C.,  
 1072 Fonseca, P.E., Munhá, J., Oliveira, J.T., and Ribeiro, A.: The Beja-Acebuches Ophiolite  
 1073 (Southern Iberia Variscan fold belt): geological characterization and significance, *Boletín*  
 1074 *Geológico Minero*, 105, 3-49, 1994.
- 1075 Quesada, C., Braid, J. A., Fernandes, P., Ferreira, P., Jorge, R. S., Matos, J. X., Murphy, J.B., Oliveira,  
 1076 J.T., Pedro, J. and Pereira, Z.: SW Iberia Variscan Suture Zone: Oceanic Affinity Units. In  
 1077 *The Geology of Iberia: A Geodynamic Approach, Volume 2: The Variscan Cycle*, edited by:  
 1078 Quesada, C., and Oliveira, J.T., Springer. 131-171. Springer, 2019.
- 1079 Ribeiro, A., Munhá, J., Fonseca, P.E., Araujo, A., Pedro, J.C., Mateus, A., Tassinari, C., Machado, G.,  
 1080 and Jesus, A.: Variscan ophiolite belts in the Ossa-Morena Zone (Southwest Iberia):  
 1081 Geological characterization and geodynamic significance, *Gondwana Research*, 17(2-3), 408-  
 1082 421, 2010.

Con formato: Inglés (Reino Unido)

- 1083 Rubio Pascual, F.J., Matas J., and Martín Parra, L.M.: High-pressure metamorphism in the Early  
1084 Variscan subduction complex of the SW Iberian Massif, *Tectonophysics*, 592, 187-199, 2013.
- 1085 Sassi, F.P., and Scolari, A.: The  $b_0$  value of the potassic white micas as a barometric indicator in low-  
1086 grade metamorphism of pelitic schists, *Contributions to Mineralogy and Petrology*, 45(2),  
1087 143-152, 1974.
- 1088 Silva, J. B., Oliveira, J.T., and Ribeiro, A.: South Portuguese Zone, ~~estrutural~~ structural outline, in:  
1089 Pre-Mesozoic Geology of Iberia, edited by: Dallmeyer, R.D., and Martínez García, E.,  
1090 Springer, Berlin, Germany, pp. 348-362, 1990.
- 1091 Simancas, J.F., Carbonell, R., Lodeiro, F.G., Pérez-Estaún, A., Juhlin, C., Ayarza, P., Kashubin, A.,  
1092 Azor, A., Martínez Poyatos, D., Almodóvar, G.R., Pascual, E., Sáez, R., and Expósito, I.:  
1093 Crustal structure of the transpressional Variscan orogen of SW Iberia: SW Iberia deep  
1094 seismic reflection profile (IBERSEIS), *Tectonics*, 22(6), 1062, 2003.
- 1095 Simancas, J.F., Expósito, I., Azor, A., Martínez Poyatos, D., and González Lodeiro, F.: From the  
1096 Cadomian orogenesis to the Early Palaeozoic Variscan rifting in Southwest Iberia, *Journal*  
1097 *of Iberian Geology*, 30, 53-71, 2004.
- 1098 Simancas, J.F., Carbonell, R., González Lodeiro, F., Pérez-Estaún, A., Juhlin, C., Ayarza, P.,  
1099 Kashubin, A., Azor A., Martínez Poyatos, D.J., Sáez, R., Almodóvar, G.R., Pascual R.,  
1100 Flecha, I., and Martí, D.: Transpressional collision tectonics and mantle plume dynamics:  
1101 The Variscides of southwestern Iberia, *Memoirs, Geol. Soc.*, 32(1), 345-354, 2006.
- 1102 Vázquez, M., Abad, I., Jiménez-Millán, J., Rocha, F.T., Fonseca, P.E., and Chaminé, H.I.: Prograde  
1103 epizonal clay mineral assemblages and retrograde alteration in tectonic basins controlled by  
1104 major strike-slip zones (W Iberian Variscan chain), *Clay Minerals*, 42(1), 109-128, 2007.
- 1105 Vidal, O., Parra, T., and Trotet, F.: A thermodynamic model for Fe-Mg aluminous chlorite using data  
1106 from phase equilibrium experiments and natural pelitic assemblages in the 100-600 °C 1-25  
1107 kbar range, *American Journal of Science*, 63, 557-592, 2001.
- 1108 Vidal, O., Parra, T., and Vicillard, P.: Thermodynamic properties of the Tschermak solid solution in  
1109 Fe-chlorite: application to natural examples and possible role of oxidation, *American*  
1110 *Mineralogist*, 90, 347-358, 2005.
- 1111 Vidal, O., de Andrade, V., Lewin, E., Muñoz, M., Parra, T., and Pascarelli, S.: P-T-deformation-  
1112 Fe<sup>3+</sup>/Fe<sup>2+</sup> mapping at the thin section scale and comparison with XANES mapping.  
1113 Application to a garnet-bearing metapelite from the Sambagawa metamorphic belt (Japan),  
1114 *Journal of Metamorphic Geology*, 24, 669-683, 2006.
- 1115 Vidal, O., Lanari, P., Munoz, M., Bourdelle, F., and De Andrade, V.: Deciphering temperature,  
1116 pressure and oxygen-activity conditions of chlorite formation, *Clay Minerals*, 51(4), 615-633,  
1117 2016.
- 1118 Warr, L.N., and Ferreiro Mählmann, R.: Recommendations for Kübler Index standardization, *Clay*  
1119 *Minerals*, 50(3), 283-286, 2015.
- 1120 Warr, L.N., and Rice, A.H.N.: Inter-laboratory standardization and calibration of clay mineral  
1121 crystallinity and crystallite size data, *Journal of Metamorphic Geology*, 12, 141-152, 1994.
- 1122 Whitney, D.L., and Evans, B.W.: Abbreviations for names of rock-forming minerals, *American*  
1123 *mineralogist*, 95(1), 185, 2010.
